# Supplementary material for: cis–trans-Amide isomerism of the 3,4-dehydroproline residue, the ‘unpuckered’ proline
Source: publisher site journal article supplement (doi:10.3762/bjoc.12.57), 2016-03-29

**Supporting Information**  
**for**  
***cis–trans*-Amide isomerism of the 3,4-dehydroproline**  
**residue, the ‘unpuckered’ proline**

Vladimir Kubyshkin\*, Nediljko Budisa\*

Address: Institute of Chemistry, Technical University of Berlin, Müller-Breslau-Str., 10,  
10623, Berlin, Germany

Email: Vladimir Kubyshkin - kubyshkin@win.tu-berlin.de;

Nediljko Budisa - nediljko.budisa@tu-berlin.de

\*Corresponding author

**Experimental procedures, values for the amide rotational barriers in different  
solvents, copies of the NMR spectra and ellipsoid diagrams  
of the X-ray crystal structures**

**Index**

|                                                      |     |
|------------------------------------------------------|-----|
| General experimental information.....                | S2  |
| Synthesis and characterization of compounds:         |     |
| - <b>9</b> .....                                     | S2  |
| - <b>3*HCl</b> .....                                 | S2  |
| - <b>4*HCl</b> .....                                 | S3  |
| - <b>6</b> .....                                     | S3  |
| - <b>8</b> .....                                     | S4  |
| Physicochemical parametrization.....                 | S6  |
| Solvent effect on the amide rotation.....            | S8  |
| Copies of the NMR spectra.....                       | S10 |
| Ellipsoid plots of the X-ray crystal structures..... | S31 |

## General experimental information

Starting compounds, reagents and solvents were obtained from commercial sources unless otherwise specified with a reference. Racemic Ac-Pro-OMe was obtained in the procedure analogous to **6** starting from *rac*-Pro methyl ester hydrochloride; and crystals for X-ray diffraction were obtained after long incubation (several months) at 4 °C. The other crystals suitable for X-ray analysis were obtained upon crystallization from dichloromethane.

<sup>1</sup>H, <sup>13</sup>C and <sup>19</sup>F NMR spectra are given in δ-scale, and the referencing was achieved using conventional deuterium lock referencing prior the spectra acquisition. The spectra were recorded at either 296 or 298 K. <sup>13</sup>C NMR spectra were recorded with proton decoupling during the acquisition. <sup>19</sup>F NMR spectra were recorded without decoupling. <sup>13</sup>C resonance multiplicities were all singlets unless the substance contained fluorine; in the latter case all multiplicities are specified. The spectral assignment was achieved using <sup>1</sup>H NOESY, <sup>13</sup>C{<sup>1</sup>H} dept45, <sup>1</sup>H{<sup>13</sup>C} HSQC and <sup>1</sup>H<sup>13</sup>C HMBC experiments and pH titration. In the spectral descriptions α-, β-, γ- and δ-letters designate 2-, 3-, 4- and 5-positions in the pyrrolidine/pyrroline rings respectively. Mass-spectra were recorded using electrospray ionization. Optical rotation was measured at 24 °C.

### 1-(*tert*-Butoxycarbonyl)-4-(trifluoromethyl)-2,5-dihydro-1*H*-pyrrole-2-carboxylic acid (**9**)

Boc-TfmDhp-OMe [**1**] (6.19 g, 21.0 mmol) was dissolved in methanol (60 ml) followed by addition of 1 M sodium hydroxide solution (25 ml, 25 mmol). Resulting mixture was stirred at 16 °C for 2 hours. Methanol was removed under reduced pressure (at ≤ 26 °C). Water (150 ml) was added, and aqueous solution was washed with TBME (3 x 100 ml). The aqueous phase was then acidified with 13% hydrogen chloride solution (14 ml) to pH ≈ 1 (pH paper) and extracted with dichloromethane (3 x 100 ml). Dichloromethane fractions were dried over sodium sulfate, filtered and concentrated in vacuum to give **9** (3.17 g, 54% yield) as a yellowish solid, T<sub>m</sub> 110-115 °C. A low value of the optical rotation ([α]<sub>D</sub> = -9, c = 1.0, MeOH) and a centrosymmetric crystal structure indicate that nearly full racemization of the stereocenter occurred during this step. <sup>1</sup>H NMR (MeOD, 700 MHz), two rotamers (5:3), δ: 6.53 (minor) and 6.50 (major) (2m, 1H, β-CH=), 5.14 (m, 1H, α-CH), 4.41-4.34 (m, 2H, δ-CH<sub>2</sub>), 1.52 (minor) and 1.47 (major) (2s, 9H, CH<sub>3</sub>). <sup>13</sup>C NMR (MeOD, 126 MHz), two rotamers, δ: 170.5 and 170.2 (2s, CO<sub>2</sub>H), 153.8 and 153.6 (2s, N-C=O), 131.2 (q, J = 35 Hz, γ-C=), 129.7 and 129.5 (2q, J = 5 Hz, β-CH=), 121.1 (q, J = 269 Hz, CF<sub>3</sub>), 81.0 and 80.9 (2s, CMe<sub>3</sub>), 66.8 and 66.5 (2s, α-CH), 50.6 and 50.3 (2s, δ-CH<sub>2</sub>), 27.2 and 27.0 (2s, CH<sub>3</sub>). <sup>19</sup>F NMR (MeOD, 471 MHz), two rotamers, δ: -67.14 (minor) and -67.16 (major) (CF<sub>3</sub>). IR bands (cm<sup>-1</sup>): 2984, 1742, 1683, 1652. Mass-spectrum: 182.04 [M+H-Boc]<sup>+</sup>. Anal. Calcd for C<sub>11</sub>H<sub>14</sub>F<sub>3</sub>NO<sub>4</sub>: H 5.02, C 46.98; found: H 4.89, C 45.65.

### (2*S*,4*S*)-4-(Trifluoromethyl)pyrrolidine-2-carboxylic acid hydrochloride (**3**\*HCl)

Boc-TfmPro [**1**] (2.43 g; 8.58 mmol) was dissolved in anhydrous dioxane (5 ml) followed by addition of 4 M hydrogen chloride dioxane solution (10 ml, 40 mmol). The resulting mixture was stirred for 3 hours at room temperature. The dioxane was removed under reduced pressure, and the residue was freeze-dried from water. The crude compound was dissolved in water and

filtered with activated charcoal (0.9 g). The filtrate was freeze-dried to give **3**\*HCl (1.84 g, 98% yield) as a greenish solid,  $T_m > 130\text{ }^{\circ}\text{C}$ .  $^1\text{H}$  NMR ( $\text{D}_2\text{O}$ , 700 MHz),  $\delta$ : 4.29 (t,  $J = 8.5\text{ Hz}$ , 1H,  $\alpha$ -CH), 3.61 (dd,  $J = 13, 9\text{ Hz}$ , 1H,  $\delta$ -CH), 3.52 (dd,  $J = 13, 7\text{ Hz}$ , 1H,  $\delta$ -CH), 3.35 (m, 1H,  $\gamma$ -CH), 2.66 (dt,  $J = 14, 9\text{ Hz}$ , 1H,  $\beta$ -CH), 2.22 (dt,  $J = 14, 8\text{ Hz}$ , 1H,  $\beta$ -CH).  $^{13}\text{C}$  NMR ( $\text{D}_2\text{O}$ , 126 MHz),  $\delta$ : 172.3 (s,  $\text{CO}_2\text{H}$ ), 126.0 (q,  $J = 278\text{ Hz}$ ,  $\text{CF}_3$ ), 61.0 (s,  $\alpha$ -CH), 44.3 (s,  $\delta$ - $\text{CH}_2$ ), 40.8 (q,  $J = 30\text{ Hz}$ ,  $\gamma$ -CH), 28.0 (s,  $\beta$ - $\text{CH}_2$ ).  $^{19}\text{F}$  NMR ( $\text{D}_2\text{O}$ , 659 MHz),  $\delta$ : -71.2 (d,  $J = 9\text{ Hz}$ ,  $\text{CF}_3$ ).  $[\alpha]_D = -16$  ( $c = 1.0$ , MeOH). IR bands ( $\text{cm}^{-1}$ ): 2879, 1734. Mass-spectrum: 184.06 [**3**+H] $^+$ . Anal. Calcd for  $\text{C}_6\text{H}_9\text{ClF}_3\text{NO}_2$ : H 4.13, C 32.82; found: H 4.39, C 32.67.

*1-Acetyl-4-(trifluoromethyl)-2,5-dihydro-1H-pyrrole-2-carboxylic acid*. Compound **4**\*HCl (29 mg, 0.13 mmol) was mixed with acetic anhydride (200  $\mu\text{l}$ ) in dichloromethane (2 ml). The resulting turbid mixture was vigorously stirred for the next 16 hours at room temperature to give a clear solution. Dichloromethane was removed using a nitrogen flow, water (1.5 ml) was added, and the mixture was freeze-dried. The residue was freeze dried from water to give Ac-TfmDhp (30 mg, quant.) as a white powder. The NMR data is given for the salt form (phosphate buffer, pH 7).  $^1\text{H}$  NMR (buffer,  $\text{D}_2\text{O}$ , 700 MHz), two rotamers (1:1),  $\delta$ : 6.48 (s-*cis*) and 6.46 (s-*trans*) (2sept.,  $J = 2\text{ Hz}$ , 1H,  $\beta$ -CH=), 5.15 (s-*cis*, sext.,  $J = 2.5\text{ Hz}$ ) and 5.03 (s-*trans*, sept.,  $J = 3\text{ Hz}$ ) (1H,  $\alpha$ -CH), 4.57 (s-*trans*, m), 4.44 and 4.35 (2dm,  $J = 16\text{ Hz}$ ) (2H,  $\delta$ - $\text{CH}_2$ ), 2.07 (s-*trans*) and 1.95 (s-*cis*) (2s, 3H,  $\text{CH}_3$ ).  $^{13}\text{C}$  NMR (buffer,  $\text{D}_2\text{O}$ , 176 MHz), two rotamers,  $\delta$ : 174.6 (s-*trans*) and 174.4 (s-*cis*) (2s,  $\text{CO}_2^-$ ), 173.1 (s-*cis*) and 172.3 (s-*trans*) (2s, N-C=O), 131.2 (m,  $\beta$ -CH=), 129.0 (m,  $\gamma$ -C=), 121.1 and 120.9 (2q,  $J = 270\text{ Hz}$ ,  $\text{CF}_3$ ), 70.8 (s-*cis*) and 69.6 (s-*trans*) (2s,  $\alpha$ -CH), 52.0 (s-*trans*) and 50.9 (s-*cis*) (2s,  $\delta$ - $\text{CH}_2$ ), 21.0 (s-*trans*) and 20.6 (s-*cis*) (2s,  $\text{CH}_3$ ).  $^{19}\text{F}$  NMR (buffer,  $\text{D}_2\text{O}$ , 659 MHz), two rotamers (1:1),  $\delta$ : -65.29 (s-*trans*) and -65.31 (s-*cis*) ( $\text{CF}_3$ ). IR bands ( $\text{cm}^{-1}$ ): 2930, 1738, 1607. Mass-spectrum: 224.05 [**4**+H] $^+$ . Anal. Calcd for  $\text{C}_8\text{H}_8\text{F}_3\text{NO}_3$ : H 3.61, C 43.06; found: H 3.90, C 43.01.

#### **4-(Trifluoromethyl)-2,5-dihydro-1H-pyrrole-2-carboxylic acid hydrochloride (**4**\*HCl)**

Compound **9** (47 mg, 0.17 mmol) was dissolved in 4 M hydrogen chloride solution in dioxane (1 ml, 4 mmol). The mixture was stirred for 3 hours, the dioxane was removed under reduced pressure, and the residue was dissolved in water and freeze-dried. Compound **4**\*HCl (34 mg, 94 % yield) was obtained as a brown solid.  $^1\text{H}$  NMR ( $\text{D}_2\text{O}$ , 700 MHz),  $\delta$ : 6.64 (sept.,  $J = 2\text{ Hz}$ , 1H,  $\beta$ -CH=), 5.21 (sept.  $J = 2.7\text{ Hz}$ , 1H,  $\alpha$ -CH), 4.42 and 4.34 (2dm,  $J = 15\text{ Hz}$ , 2H,  $\delta$ - $\text{CH}_2$ ).  $^{13}\text{C}$  NMR ( $\text{D}_2\text{O}$ , 126 MHz),  $\delta$ : 168.9 (s,  $\text{CO}_2\text{H}$ ), 130.3 (q,  $J = 5\text{ Hz}$ ,  $\beta$ -CH=), 128.3 (q,  $J = 37\text{ Hz}$ ,  $\gamma$ -C=), 120.2 (q,  $J = 270\text{ Hz}$ ,  $\text{CF}_3$ ), 68.0 (s,  $\alpha$ -CH), 49.6 (s,  $\delta$ - $\text{CH}_2$ ).  $^{19}\text{F}$  NMR ( $\text{D}_2\text{O}$ , 471 MHz),  $\delta$ : -65.0 (s,  $\text{CF}_3$ ). IR bands ( $\text{cm}^{-1}$ ): 2848, 1746, 1680. Mass-spectrum: 182.04 [**4**+H] $^+$ . Anal. Calcd for  $\text{C}_8\text{H}_8\text{F}_3\text{NO}_3$ : H 3.61, C 43.06; found: H 3.90, C 42.80. Anal. Calcd for  $\text{C}_6\text{H}_7\text{ClF}_3\text{NO}_2$ : H 3.24, C 33.12; found: H 3.60, C 32.88.

#### **Methyl (**5**)-1-acetyl-2,5-dihydro-1H-pyrrole-2-carboxylate (**6**)**

Methyl 3,4-dehydroprolinate hydrochloride (124 mg, 0.75 mmol) was mixed with acetic anhydride (200  $\mu\text{l}$ ) in dichloromethane (3 ml) at room temperature for 20 min. Dichloromethane was removed under reduced pressure, the residue was dissolved in a minimal amount of water and freeze-dried. The crude compound was purified on a silica gel column (ethyl acetate–

methanol 19:1 as eluent) to give **6** (71 mg, 55% yield) as a colorless solid,  $T_m$  70-75 °C.  $^1\text{H}$  NMR ( $\text{D}_2\text{O}$ , 700 MHz), two rotamers,  $\delta$ : 6.04 (m, 1H,  $\gamma\text{-CH=}$ ), 5.81 (minor) and 5.78 (major) (2m, 1H,  $\beta\text{-CH=}$ ), 5.32 (minor) and 5.09 (major) (two m, 1H,  $\alpha\text{-CH}$ ), 4.37 (major, dm,  $J = 15$  Hz), 4.33 (major, dm,  $J = 15$  Hz), 4.24 (minor, dm,  $J = 16$  Hz) and 4.12 (minor, dm,  $J = 16$  Hz) (2H,  $\delta\text{-CH}_2$ ), 3.73 (minor) and 3.69 (major) (2s, 3H,  $\text{CH}_3\text{O}$ ), 2.06 (major) and 1.94 (minor) (2s, 3H,  $\text{CH}_3\text{C=O}$ ).  $^{13}\text{C}$  NMR ( $\text{D}_2\text{O}$ , 126 MHz), two rotamers,  $\delta$ : 173.3 (minor N-C=O), 172.8 (major, N-C=O), 172.6 (major  $\text{CO}_2\text{Me}$ ), 172.3 (minor  $\text{CO}_2\text{Me}$ ), 129.5 (major  $\gamma\text{-CH=}$ ), 128.9 (minor  $\gamma\text{-CH=}$ ), 124.0 (minor  $\beta\text{-CH=}$ ), 123.6 (major  $\beta\text{-CH=}$ ), 67.3 (minor  $\alpha\text{-CH}$ ), 66.2 (major,  $\alpha\text{-CH}$ ), 54.7 (major  $\delta\text{-CH}_2$ ), 53.6 (minor  $\delta\text{-CH}_2$ ), 53.4 (minor  $\text{CH}_3\text{O}$ ), 53.2 (major  $\text{CH}_3\text{O}$ ), 20.85 (minor  $\text{CH}_3\text{C=O}$ ), 20.83 (major  $\text{CH}_3\text{C=O}$ ).  $[\alpha]_D = -337$  ( $c = 1.0$ ,  $\text{CHCl}_3$ ). IR bands ( $\text{cm}^{-1}$ ): 3084, 2952, 1744, 1637, 1618. Mass-spectrum: 170.08  $[\text{M}+1]^+$ . Anal. Calcd for  $\text{C}_8\text{H}_{11}\text{NO}_3$ : H 6.55, C 56.80; found: H 6.50, C 56.59.

(*S*)-1-Acetyl-2,5-dihydro-1*H*-pyrrole-2-carboxylic acid. Compound **6** (35 mg, 0.21 mmol) was dissolved in water (2 ml) followed by addition of 1 M sodium hydroxide solution (215  $\mu\text{l}$ ). The mixture was stirred at the room temperature for 1.5 hours. The aqueous solution was then washed with dichloromethane (1 x 2 ml), and freeze-dried. 1 M hydrogen chloride aqueous solution (300  $\mu\text{l}$ ) and water (2 ml) were added, and resulting solution was freeze-dried. The  $\text{p}K_a$  values of the target compound were measured without isolation of the material from the remaining sodium chloride. The NMR data is given for the salt form (phosphate buffer, pH 7).  $^1\text{H}$  NMR (buffer,  $\text{D}_2\text{O}$ , 700 MHz), two rotamers (1:1),  $\delta$ : 5.94 (m, 1H,  $\gamma\text{-CH=}$ ), 5.81 (m, 1H,  $\beta\text{-CH=}$ ), 4.98 and 4.87 (2sext.,  $J = 2.2$  Hz, 1H,  $\alpha\text{-CH}$ ), 4.36 (dm,  $J = 15$  Hz), 4.32 (dq,  $J = 15$ , 2.1 Hz), 4.22 (dq,  $J = 16$ , 2 Hz) and 4.16 (ddt,  $J = 16$ , 5 and 2 Hz) (2H,  $\delta\text{-CH}_2$ ), 2.06 and 1.94 (2s, 3H,  $\text{CH}_3$ ).  $^{13}\text{C}$  NMR (buffer,  $\text{D}_2\text{O}$ , 126 MHz), two rotamers,  $\delta$ : 177.1 (*s-trans*) and 177.0 (*s-cis*) ( $\text{CO}_2^-$ ), 173.0 (*s-cis*) and 172.2 (*s-trans*) (N-C=O), 127.1 and 126.9 ( $\gamma\text{-CH=}$ ), 126.4 and 126.3 ( $\beta\text{-CH=}$ ), 70.7 (*s-cis*) and 69.2 (*s-trans*) ( $\alpha\text{-CH}$ ), 54.9 (*s-trans*) and 53.6 (*s-cis*) ( $\delta\text{-CH}_2$ ), 21.1 (*s-trans*) and 20.9 (*s-cis*) ( $\text{CH}_3$ ).

### Methyl (*S*)-1-acetyl-4-(trifluoromethyl)-2,5-dihydro-1*H*-pyrrole-2-carboxylate (**8**)

Methyl (*S*)-4-(trifluoromethyl)-2,5-dihydro-1*H*-pyrrole-2-carboxylate. Boc-TfmDhp-OMe [**1**] (110 mg, 0.37 mmol) was dissolved in 4 M hydrogen chloride solution in dioxane (1.5 ml, 6.0 mmol). (NB: lower acid concentrations (i.e. 2 M HCl/dioxane) result in only partial removal of the Boc-group, due to the low basicity of the amine functionality. See Table 1) The resulting mixture was stirred for 10 hours at room temperature, dioxane was removed under reduced pressure, water was added and the aqueous solution was freeze-dried to give HCl\*TfmDhp-OMe as a white powder.  $^1\text{H}$  NMR ( $\text{D}_2\text{O}$ , 700 MHz),  $\delta$ : 6.70 (sept.,  $J = 2$  Hz,  $\beta\text{-CH=}$ ), 5.51 (sept.  $J = 2.7$  Hz, 1H,  $\alpha\text{-CH}$ ), 4.45 and 4.39 (2dm,  $J = 15$  Hz, 2H,  $\delta\text{-CH}_2$ ), 3.84 (s, 3H,  $\text{CH}_3\text{O}$ ).  $^{19}\text{F}$  NMR ( $\text{D}_2\text{O}$ , 471 MHz),  $\delta$ : -65.2 (s,  $\text{CF}_3$ ).

This salt was then mixed with dichloromethane (4 ml), and acetic anhydride (200  $\mu\text{l}$ ) was added to the turbid mixture. The mixture was stirred at room temperature for 1.5 hours, additional acetic anhydride (200  $\mu\text{l}$ ) was added, and stirring was continued for the next 1.5 hours. When the resulting solution was clear, the dichloromethane was removed under reduced pressure, water was added in order to quench remaining anhydride, and aqueous solution was freeze-

dried. Compound **8** (84 mg, 95% yield) was obtained as a yellowish crystalline solid,  $T_m$  65-70 °C.  $^1\text{H}$  NMR ( $\text{D}_2\text{O}$ , 700 MHz), two rotamers,  $\delta$ : 6.54 (minor) and 6.49 (major) (2m, 1H,  $\beta\text{-CH=}$ ), 5.56 (minor) and 5.29 (major) (2m, 1H,  $\alpha\text{-CH}$ ), 4.61 (m, major) and 4.48 and 4.33 (2dm,  $J = 16$  Hz, minor) (2H,  $\delta\text{-CH}_2$ ), 3.77 (minor) and 3.72 (major) (2s,  $\text{CH}_3\text{O}$ ), 2.09 (major) and 1.97 (minor) (2s,  $\text{CCH}_3$ ).  $^{13}\text{C}$  NMR ( $\text{D}_2\text{O}$ , 176 MHz), two rotamers,  $\delta$ : 173.3 (minor) and 172.9 (major) (2s,  $\text{N-C=O}$ ), 170.5 (major) and 170.3 (minor) (2s,  $\text{CO}_2\text{Me}$ ), 131.4 (major) and 130.8 (minor) (2q,  $J = 36$  Hz,  $\gamma\text{-C=}$ ), 128.9 (minor) and 128.4 (major) (2q,  $J = 5$  Hz,  $\beta\text{-CH=}$ ), 120.8 (minor) and 120.5 (major) (2q,  $J = 269$  Hz,  $\text{CF}_3$ ), 67.2 (minor) and 66.4 (major) (2s,  $\alpha\text{-CH}$ ), 53.7 (minor) and 53.4 (major) (2s,  $\text{CH}_3\text{O}$ ), 51.8 (major) and 50.9 (minor) (2s,  $\delta\text{-CH}_2$ ), 20.7 (major) and 20.6 (minor) (2s,  $\text{CH}_3\text{C=O}$ ).  $^{19}\text{F}$  NMR ( $\text{D}_2\text{O}$ , 659 MHz), two rotamers,  $\delta$ : -65.6 (minor) and -65.7 (major) (2s,  $\text{CF}_3$ ).  $[\alpha]_D = -238$  ( $c = 1.0$ ,  $\text{CHCl}_3$ ). IR bands ( $\text{cm}^{-1}$ ): 3083, 2961, 1750, 1646. Mass-spectrum: 238.07  $[\text{M}+1]^+$ . Anal. Calcd for  $\text{C}_9\text{H}_{10}\text{F}_3\text{NO}_3$ : H 4.25, C 45.58; found: H 4.40, C 45.32.

## Physicochemical parametrization

All  $pK_a$  parameters were determined at 298 K by NMR of buffered solutions which contained analyte and potassium phosphate buffer (3–10 mM) or/and citrate buffer. These solutions were titrated with hydrogen chloride and potassium hydroxide in a suitable pH range. 500  $\mu$ l aliquots were taken at different pH values, and 55  $\mu$ l deuterium oxide was added for lock and shimming. Samples also contained 0.1 mM of sodium 3-(trimethylsilyl)-1-propanesulfonate for  $^1\text{H}$  referencing. The  $^1\text{H}$  NMR spectra were collected with bulk water suppression using W5 pulse tray.  $^{19}\text{F}$  NMR spectra were collected in single-pulse experiments. Chemical shifts were plotted against pH, fitted according to Boltzmann fit. 1<sup>st</sup> order derivative of a fit curve indicated the  $pK_a$  value as the extremum point.

Rotational rates were determined in solutions of Ac-Xaa-OMe compounds by  $^1\text{H}$  2D cross-relaxation experiments (NOESY-EXSY). The spectra were recorded at 310 K according to the methanol temperature calibration [2]. Mixing time was 1 and 2 s for exchange and 5 ms for referencing; the recycling delay was chosen as  $\geq 3 \cdot T_1$  for the analyzed resonances. Time domain was inset such that the resolution was 5–2 Hz in the direct and 20–10 Hz in the indirect dimensions respectively. The resolution of the indirect dimension was zero-filled to reach the direct dimension resolution and the time domain spectra were windowed (squared sine bell function) and Fourier transformed. Frequency domain spectra were baseline corrected and integrated. The integrals were analyzed using EXSYCalc® freeware to give corresponding rotational rates ( $k$ ). Activation energies were derived from these values using Eyring equation as following:

$$E^\ddagger = -(\ln(k/T) - 23.76) \cdot T \cdot R$$

, where  $T$  – absolute temperature,  $R$  – gas constant, and  $\ln(k_B/h) = 23.76$  ( $k_B$  – Boltzmann constant,  $h$  – Planck constant). The  $pK_a$  values and the rotational rates for Pro and its 4-substituted derivatives were collected from the literature [1,3,4].

The equilibrium *s-trans/s-cis* population ratios were determined by  $^1\text{H}$  NMR of the deuterium oxide solutions at 700 MHz proton frequency and 296 K. The spectra were recorded in one scan in order to ensure complete relaxation of the nuclei. This precaution was especially valid for Dhp derivatives, where several resonances exhibited drastically high relaxation times, producing distorted integrals in multiscan experiments with standard relaxation delays.

## References

1. Kubyshkin, V.; Afonin, S.; Kara, S.; Budisa, N.; Mykhailiuk, P. K.; Ulrich, A. S. *Org. Biomol. Chem.* **2015**, *13*, 3171-3181
2. Van Geet, A. L. *Anal. Chem.* **1970**, *42*, 679-680

3. Renner, C.; Alefelder, S.; Bae, J. H.; Budisa, N.; Huber, R.; Moroder, L. *Angew. Chem., Int. Ed.* **2001**, *40*, 923–925. doi:10.1002/1521-3773(20010302)40:5<923::AID-ANIE923>3.0.CO;2-#
4. Doerfel, L.; Wohlgemuth, I.; Kubyskin, V.; Starosta, A. L.; Wilson, D. N.; Budisa, N.; Rodnina, M. V. *J. Am. Chem. Soc.* **2015**, *137*, 12997–13006. doi:10.1021/jacs.5b07427

## Solvent effect on the amide rotation

The amide rotation barrier have been also determined for AcXaaOMe in other organic solvents: MeOD, DMSO and  $\text{CDCl}_3$ . Resulting values were correlated to the solvent's Reichardt–Dimroth parameter, which reflects the ability of solvents to separate charges. The charge separation should affect the amide ground state energy according to the following scheme:

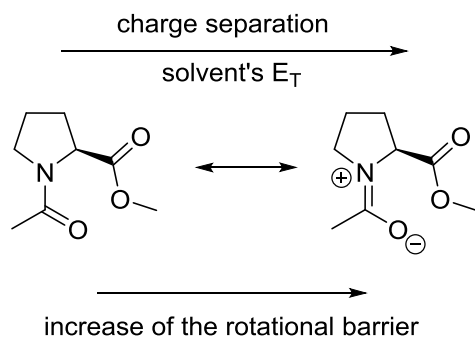

The amide rotation activation energies were determined at 310 K.  $E_a$  mean designates the mean value of the *s-cis*-to-*s-trans* and *s-trans*-to-*s-cis* isomerization barriers for each solvent/compound pair. The resulting correlation indicates similarities in the charge separation in the ground states, thus the activation energy offset in Dhp and tfmDhp is more likely to originate from the transition state effects as claimed in the main text.

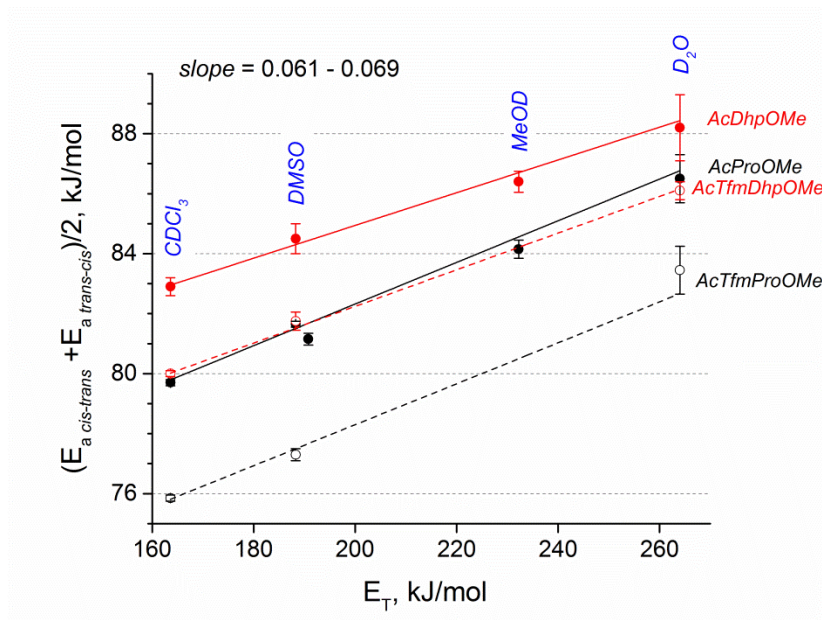



Found activation energies (310 K):

| $E_T$ ,<br>kJ/mol | solvent           | $E_a$ , kJ/mol        |          |                       |                       |             |          |                       |                       |
|-------------------|-------------------|-----------------------|----------|-----------------------|-----------------------|-------------|----------|-----------------------|-----------------------|
|                   |                   | AcProOMe, 5           |          | AcTfmProOMe, 7        |                       | AcDhpOMe, 6 |          | AcTfmDhpOMe, 8        |                       |
|                   |                   | c→t                   | t→c      | c→t                   | t→c                   | c→t         | t→c      | c→t                   | t→c                   |
| 264.01            | D <sub>2</sub> O  | 84.5±0.8              | 88.5±0.9 | 81.4±0.2              | 84.9±0.3              | 86.1±1.4    | 90.3±0.7 | 84.0±0.4              | 88.2±0.2              |
| 232.21            | MeOD              | 82.6±0.2              | 85.7±0.4 | –                     | –                     | 84.9±0.4    | 87.9±0.3 | –                     | –                     |
| 188.28            | DMSO              | 80.1±0.0 <sub>4</sub> | 83.2±0.1 | 75.9±0.2              | 78.7±0.1              | 83.3±0.4    | 85.7±0.5 | 80.1±0.4              | 83.4±0.2              |
| 163.59            | CDCl <sub>3</sub> | 78.0±0.0 <sub>5</sub> | 81.4±0.1 | 74.4±0.0 <sub>3</sub> | 77.3±0.0 <sub>3</sub> | 82.0±0.2    | 83.8±0.4 | 78.5±0.0 <sub>3</sub> | 81.5±0.0 <sub>5</sub> |

<sup>1</sup>H NMR spectrum of compound **9** (Boc-TfmDhp) in MeOD

Current Data Parameters  
NAME wova\_JT\_TfmDhp  
EXPNO 131  
PROCNO 1

F2 - Acquisition Parameters  
Date\_ 20151210  
Time 10.47  
INSTRUM spect  
PROBHD 5 mm PATXI 1H/  
PULPROG zg  
TD 65536  
SOLVENT MeOD  
NS 1  
DS 0  
SWH 8333.333 Hz  
FIDRES 0.127157 Hz  
AQ 3.9321599 sec  
RG 41.2  
DW 60.000 usec  
DE 10.00 usec  
TE 299.6 K  
D1 2.00000000 sec  
TD0 1

===== CHANNEL f1 =====  
SFO1 700.1732898 MHz  
NUC1 1H  
P1 11.50 usec  
PLW1 15.00000000 W

F2 - Processing parameters  
SI 32768  
SF 700.1700000 MHz  
WDW EM  
SSB 0  
LB 0.30 Hz  
GB 0  
PC 10.00

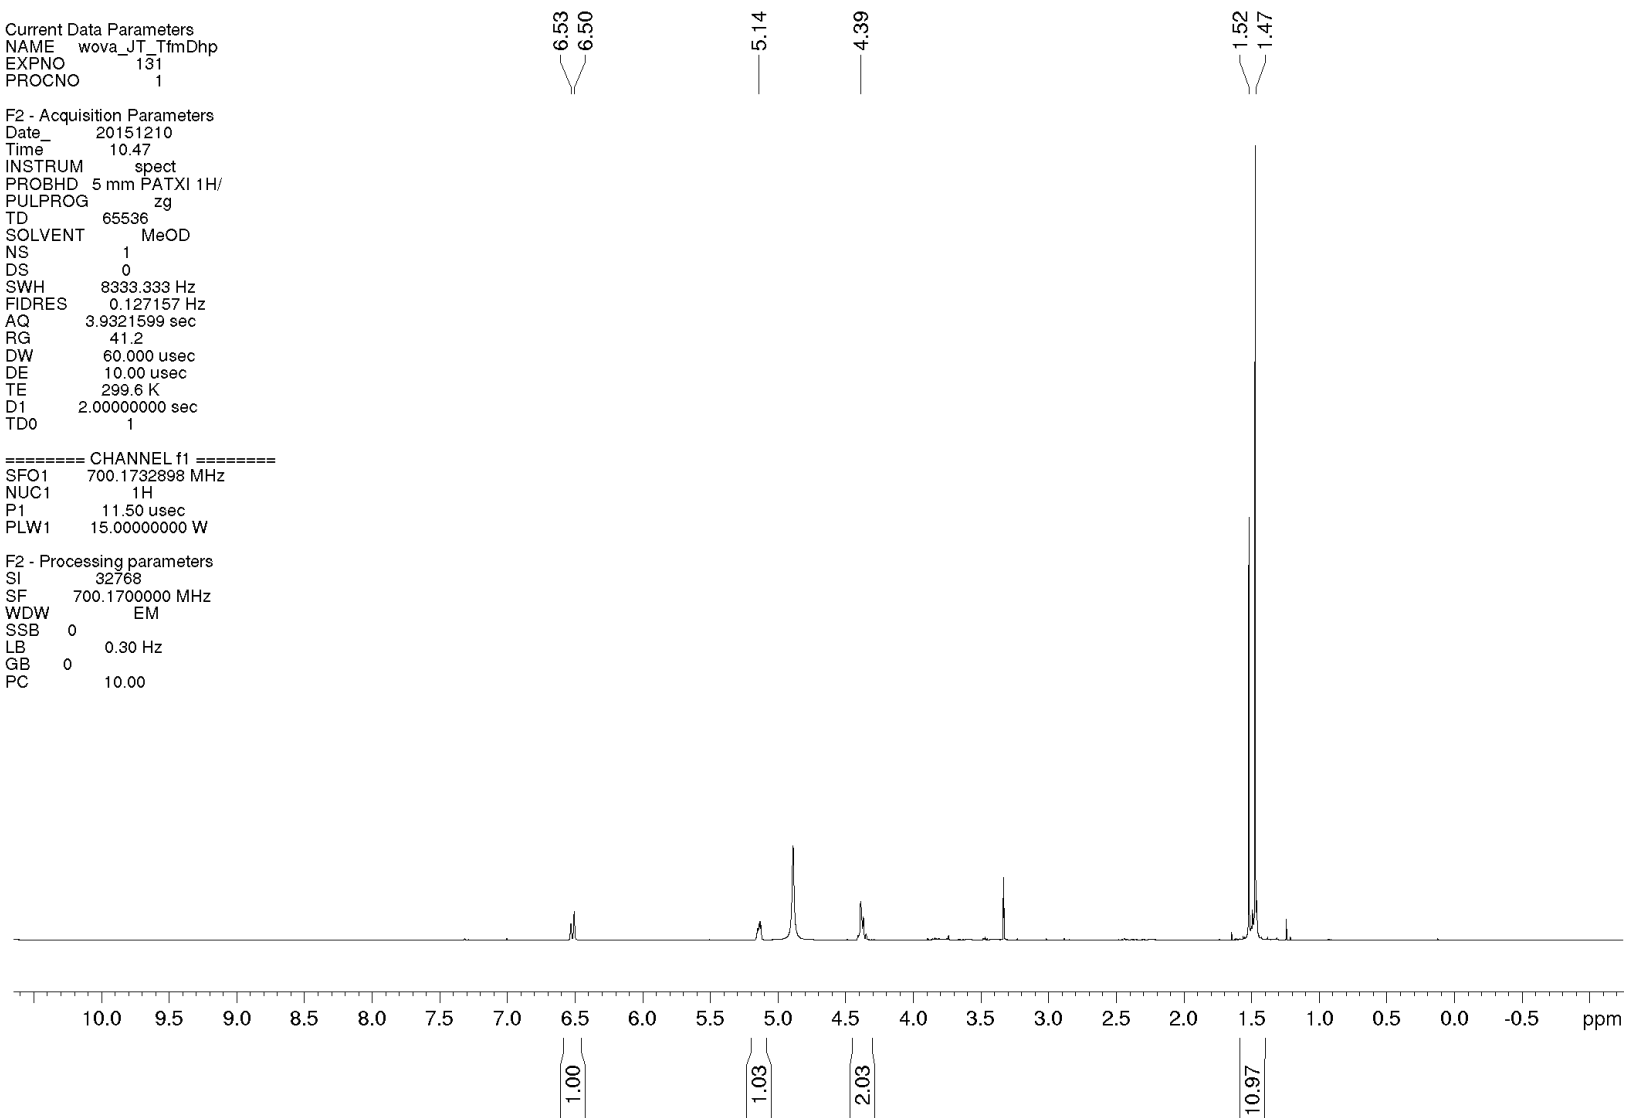

S10

$^{13}\text{C}\{^1\text{H}\}$  NMR spectrum of compound **9** (Boc-TfmDhp) in MeOD

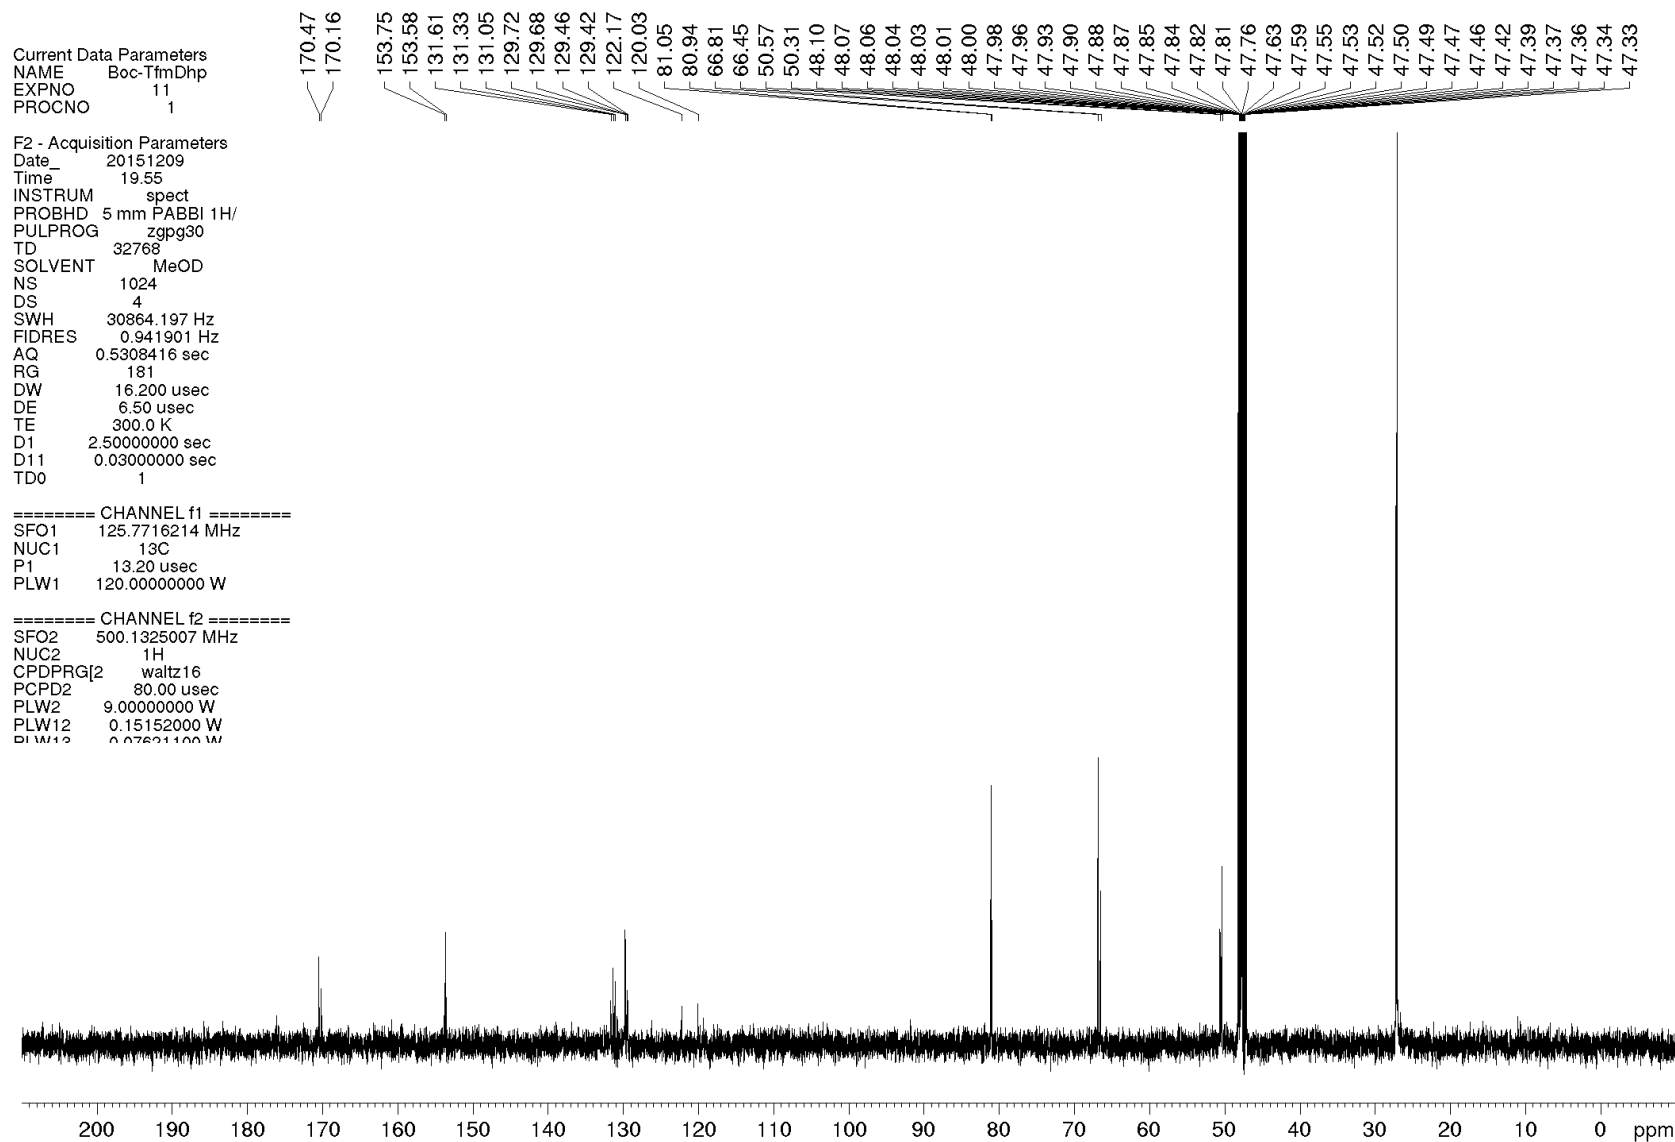

<sup>19</sup>F NMR spectrum of compound **9** (Boc-TfmDhp) in MeOD

Current Data Parameters  
NAME wova\_JT\_TfmDhp  
EXPNO 171  
PROCNO 1

F2 - Acquisition Parameters  
Date\_ 20151210  
Time 10.37  
INSTRUM spect  
PROBHD 5 mm PABBO BB/  
PULPROG zg  
TD 65536  
SOLVENT MeOD  
NS 1  
DS 0  
SWH 33333.332 Hz  
FIDRES 0.508626 Hz  
AQ 0.9830400 sec  
RG 2050  
DW 15.000 usec  
DE 80.00 usec  
TE 298.0 K  
D1 2.50000000 sec  
TD0 1

===== CHANNEL f1 =====  
SFO1 470.6743524 MHz  
NUC1 19F  
P1 14.75 usec  
PLW1 42.00000000 W

F2 - Processing parameters  
SI 32768  
SF 470.7052900 MHz  
WDW EM  
SSB 0  
LB 0.30 Hz  
GB 0  
PC 1.00

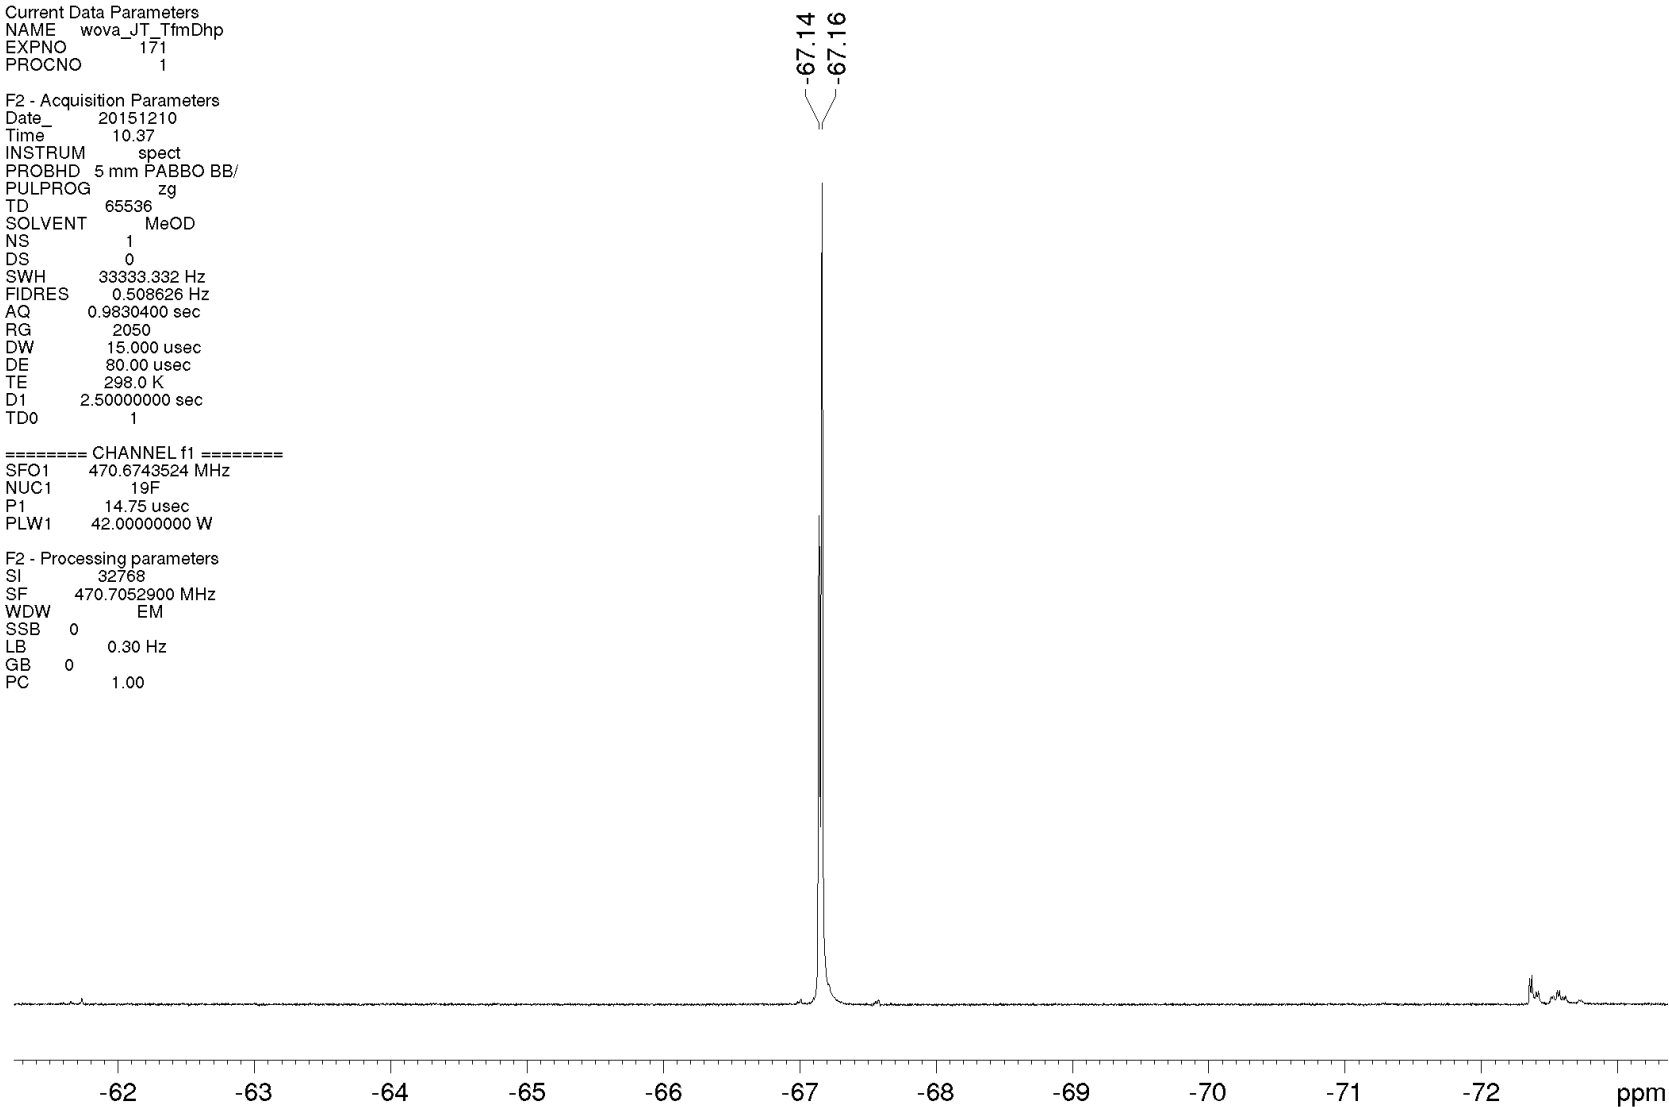

S12

<sup>1</sup>H NMR spectrum of compound **3**\*HCl (HCl\*TfmPro) in D<sub>2</sub>O

Current Data Parameters  
NAME wova\_TfmPro  
EXPNO 83  
PROCNO 1

F2 - Acquisition Parameters  
Date\_ 20141104  
Time 17.00  
INSTRUM spect  
PROBHD 5 mm PATXI 1H/  
PULPROG zg  
TD 102400  
SOLVENT D2O  
NS 8  
DS 0  
SWH 10000.000 Hz  
FIDRES 0.097656 Hz  
AQ 5.1199999 sec  
RG 45.24  
DW 50.000 usec  
DE 6.50 usec  
TE 298.0 K  
D1 2.00000000 sec  
TD0 1

===== CHANNEL f1 =====  
SFO1 700.1732874 MHz  
NUC1 1H  
P1 12.35 usec  
PLW1 15.00000000 W

F2 - Processing parameters  
SI 32768  
SF 700.1700000 MHz  
WDW EM  
SSB 0  
LB 0.20 Hz  
GB 0  
PC 10.00

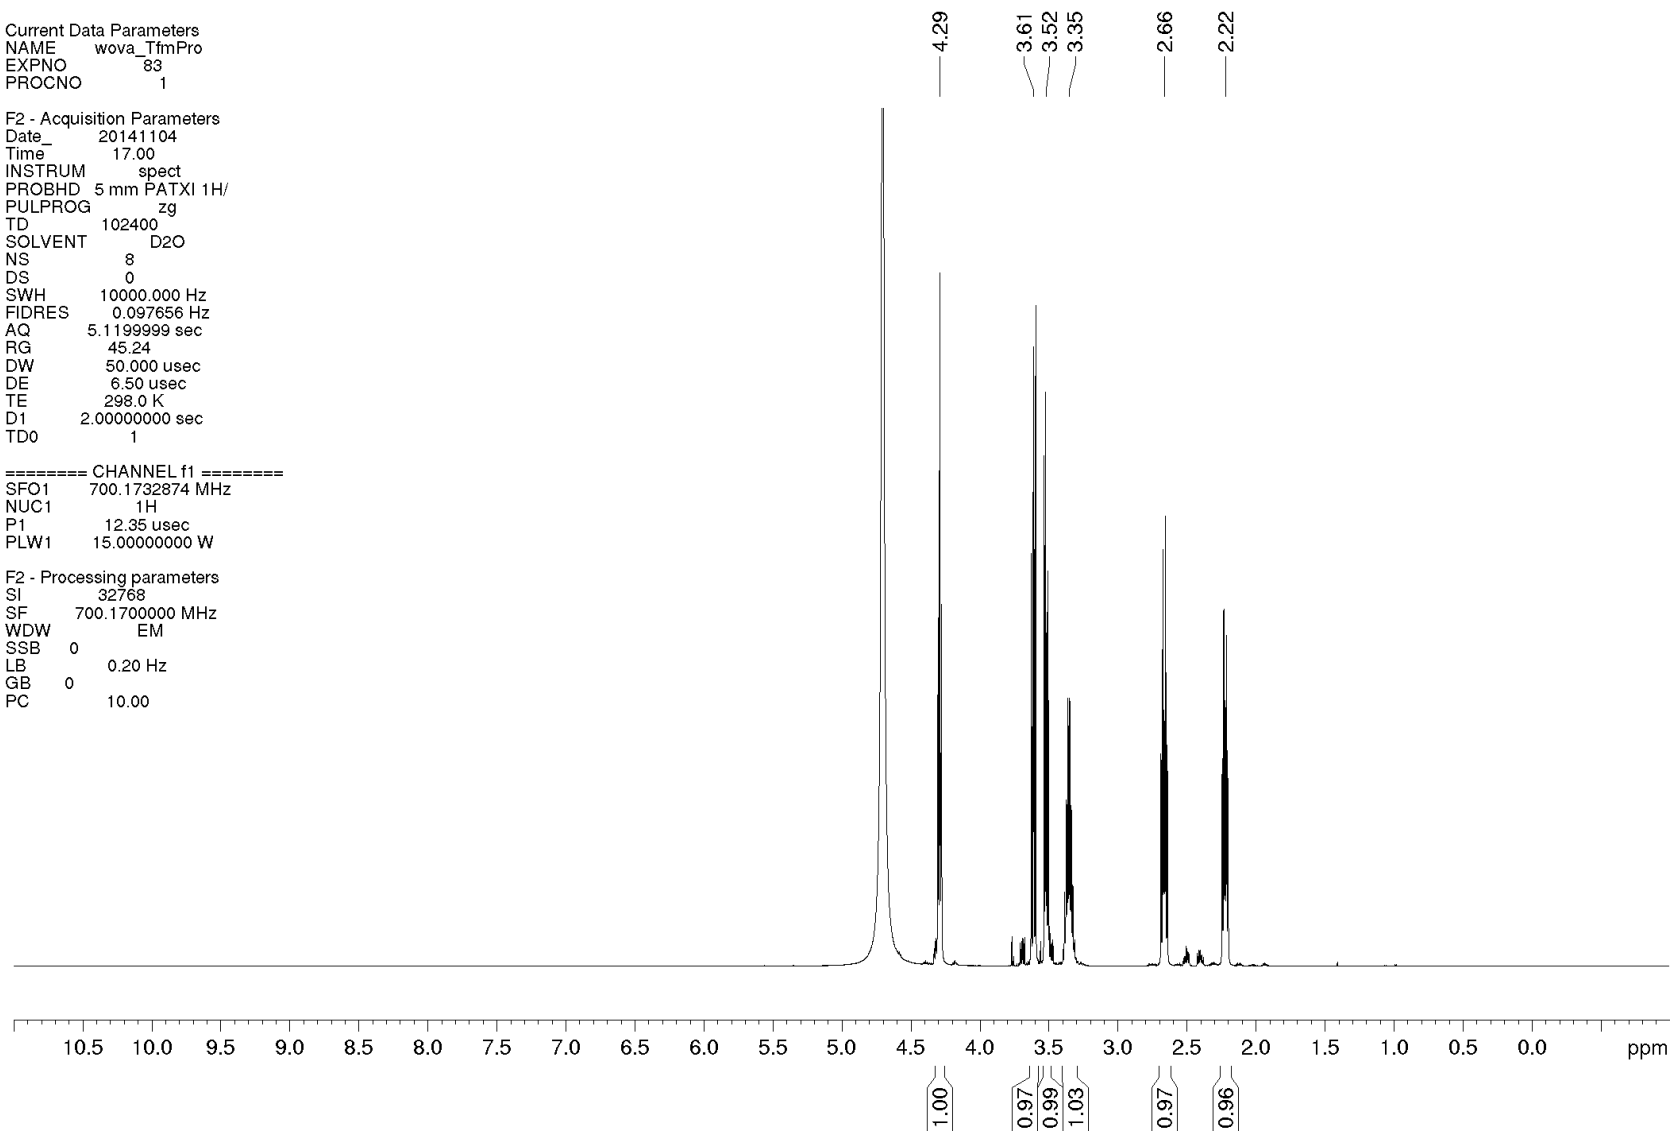

S13

$^{13}\text{C}\{^1\text{H}\}$  NMR spectrum of compound **3**\*HCl (HCl\*TfmPro) in D<sub>2</sub>O

Current Data Parameters  
NAME wova\_TfmPro  
EXPNO 85  
PROCNO 1

F2 - Acquisition Parameters  
Date\_ 20141104  
Time 17.10  
INSTRUM spect  
PROBHD 5 mm PATXI 1H/  
PULPROG zgig30  
TD 65536  
SOLVENT D2O  
NS 2048  
DS 4  
SWH 40760.871 Hz  
FIDRES 0.621962 Hz  
AQ 0.8039083 sec  
RG 2050  
DW 12.267 usec  
DE 6.50 usec  
TE 298.1 K  
D1 1.50000000 sec  
D11 0.03000000 sec  
TD0 256

===== CHANNEL f1 =====  
SFO1 176.0763711 MHz  
NUC1  $^{13}\text{C}$   
P1 12.00 usec  
PLW1 250.0000000 W

===== CHANNEL f2 =====  
SFO2 700.1728007 MHz  
NUC2  $^1\text{H}$   
CPDPRG2 waltz16  
PCPD2 65.00 usec  
PLW2 15.00000000 W  
PLW12 0.35148999 W

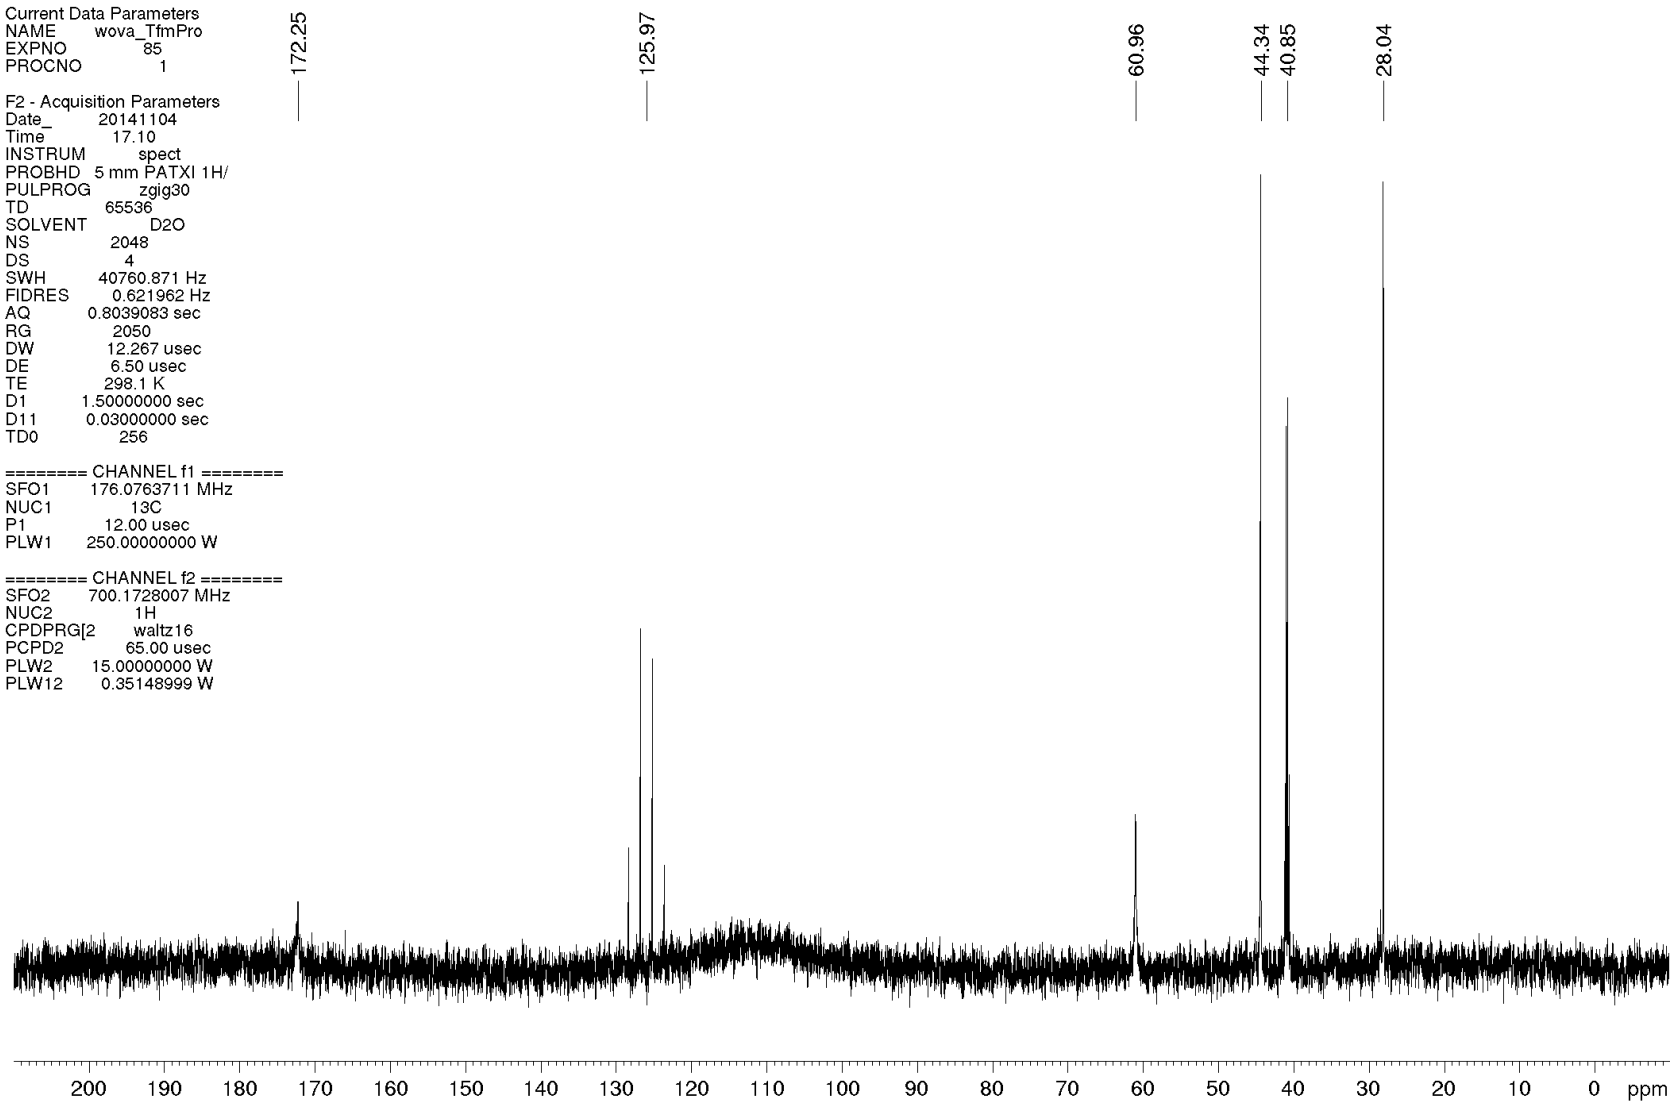

<sup>19</sup>F NMR spectrum of compound **3**\*HCl (HCl\*TfmPro) in D<sub>2</sub>O

Current Data Parameters  
NAME wova\_TfmPro  
EXPNO 82  
PROCNO 1

F2 - Acquisition Parameters  
Date\_ 20141104  
Time 16.49  
INSTRUM spect  
PROBHD 5 mm PATXI 1H/  
PULPROG zg  
TD 32768  
SOLVENT D2O  
NS 16  
DS 0  
SWH 13157.895 Hz  
FIDRES 0.401547 Hz  
AQ 1.2451839 sec  
RG 174.29  
DW 38.000 usec  
DE 50.00 usec  
TE 298.0 K  
D1 2.00000000 sec  
TD0 2

===== CHANNEL f1 =====  
SFO1 658.7686256 MHz  
NUC1 19F  
P1 10.75 usec  
PLW1 15.00000000 W

F2 - Processing parameters  
SI 65536  
SF 658.8180370 MHz  
WDW GM  
SSB 0  
LB -1.00 Hz  
GB 0.02  
PC 10.00

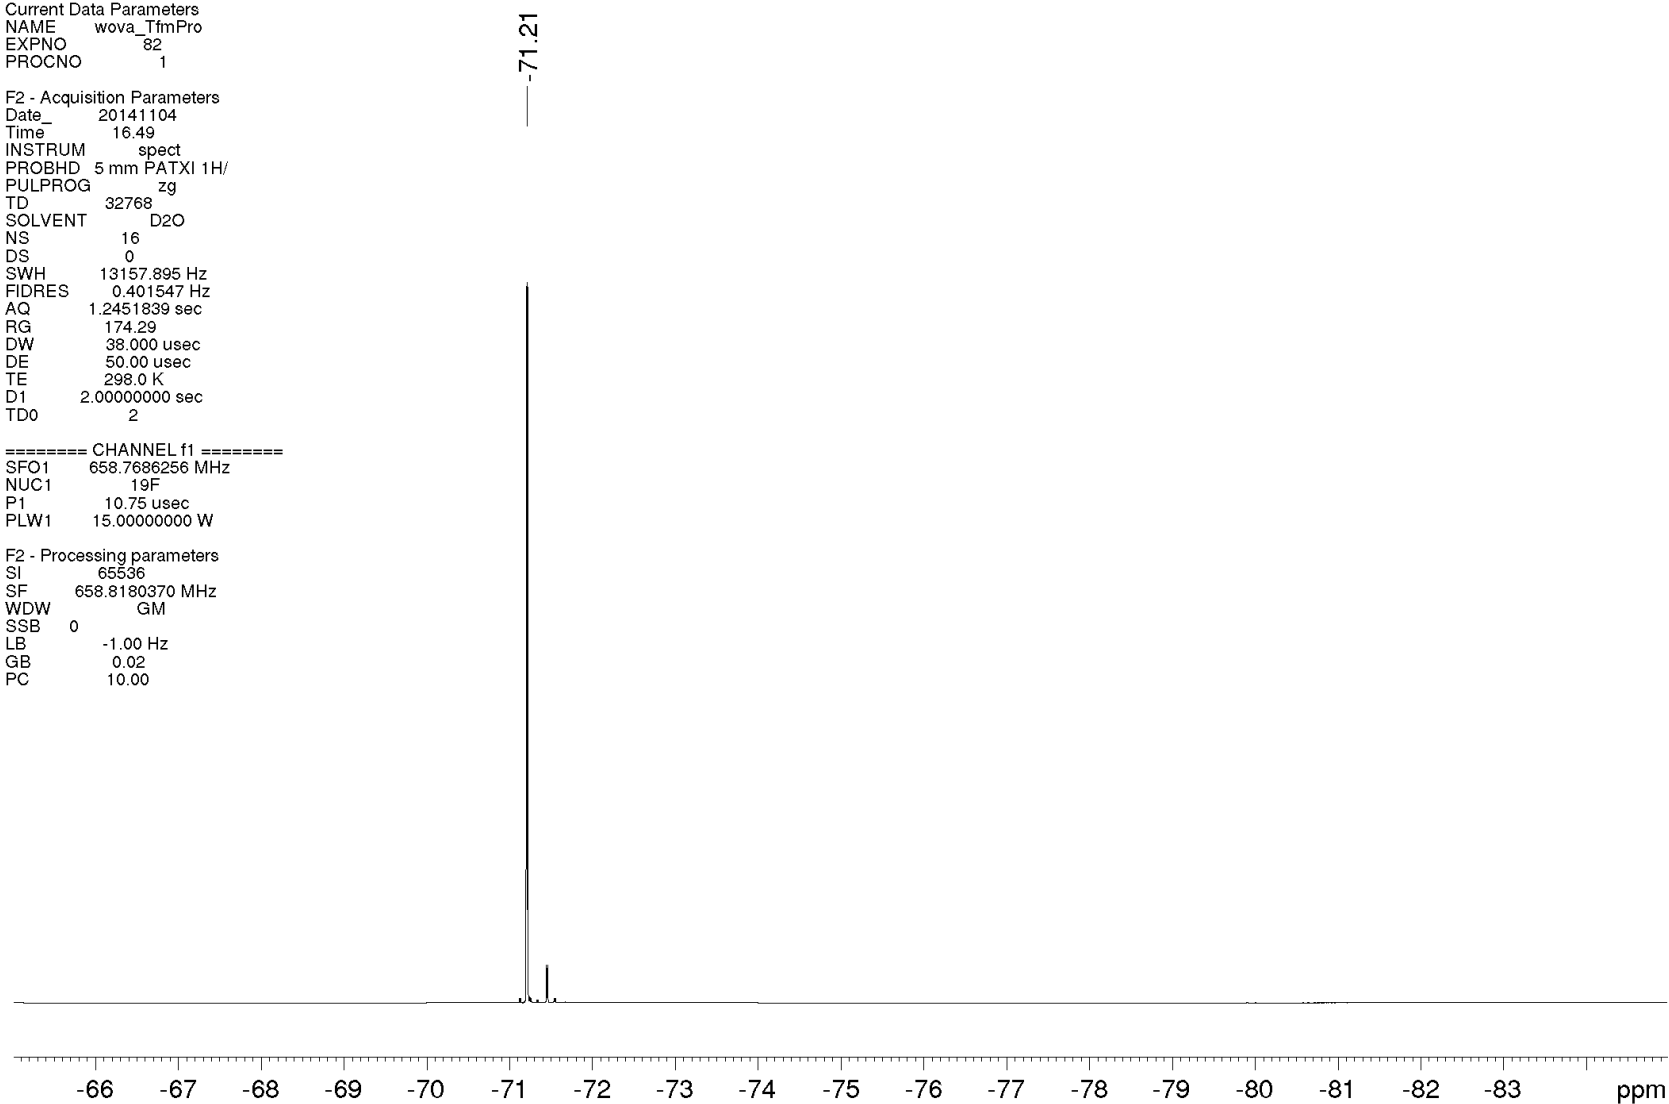

S15

<sup>1</sup>H NMR spectrum of compound **4**\*HCl (HCl\*TfmDhp) in D<sub>2</sub>O

Current Data Parameters  
NAME wova\_JT\_TfmDhp  
EXPNO 120  
PROCNO 1

F2 - Acquisition Parameters  
Date\_ 20151210  
Time 10.27  
INSTRUM spect  
PROBHD 5 mm PATXI 1H/  
PULPROG zg  
TD 65536  
SOLVENT D2O  
NS 1  
DS 0  
SWH 8333.333 Hz  
FIDRES 0.127157 Hz  
AQ 3.9321599 sec  
RG 7.99  
DW 60.000 usec  
DE 10.00 usec  
TE 299.6 K  
D1 2.00000000 sec  
TD0 1

===== CHANNEL f1 =====  
SFO1 700.1732898 MHz  
NUC1 1H  
P1 12.25 usec  
PLW1 15.00000000 W

F2 - Processing parameters  
SI 32768  
SF 700.1700000 MHz  
WDW EM  
SSB 0  
LB 0.30 Hz  
GB 0  
PC 10.00

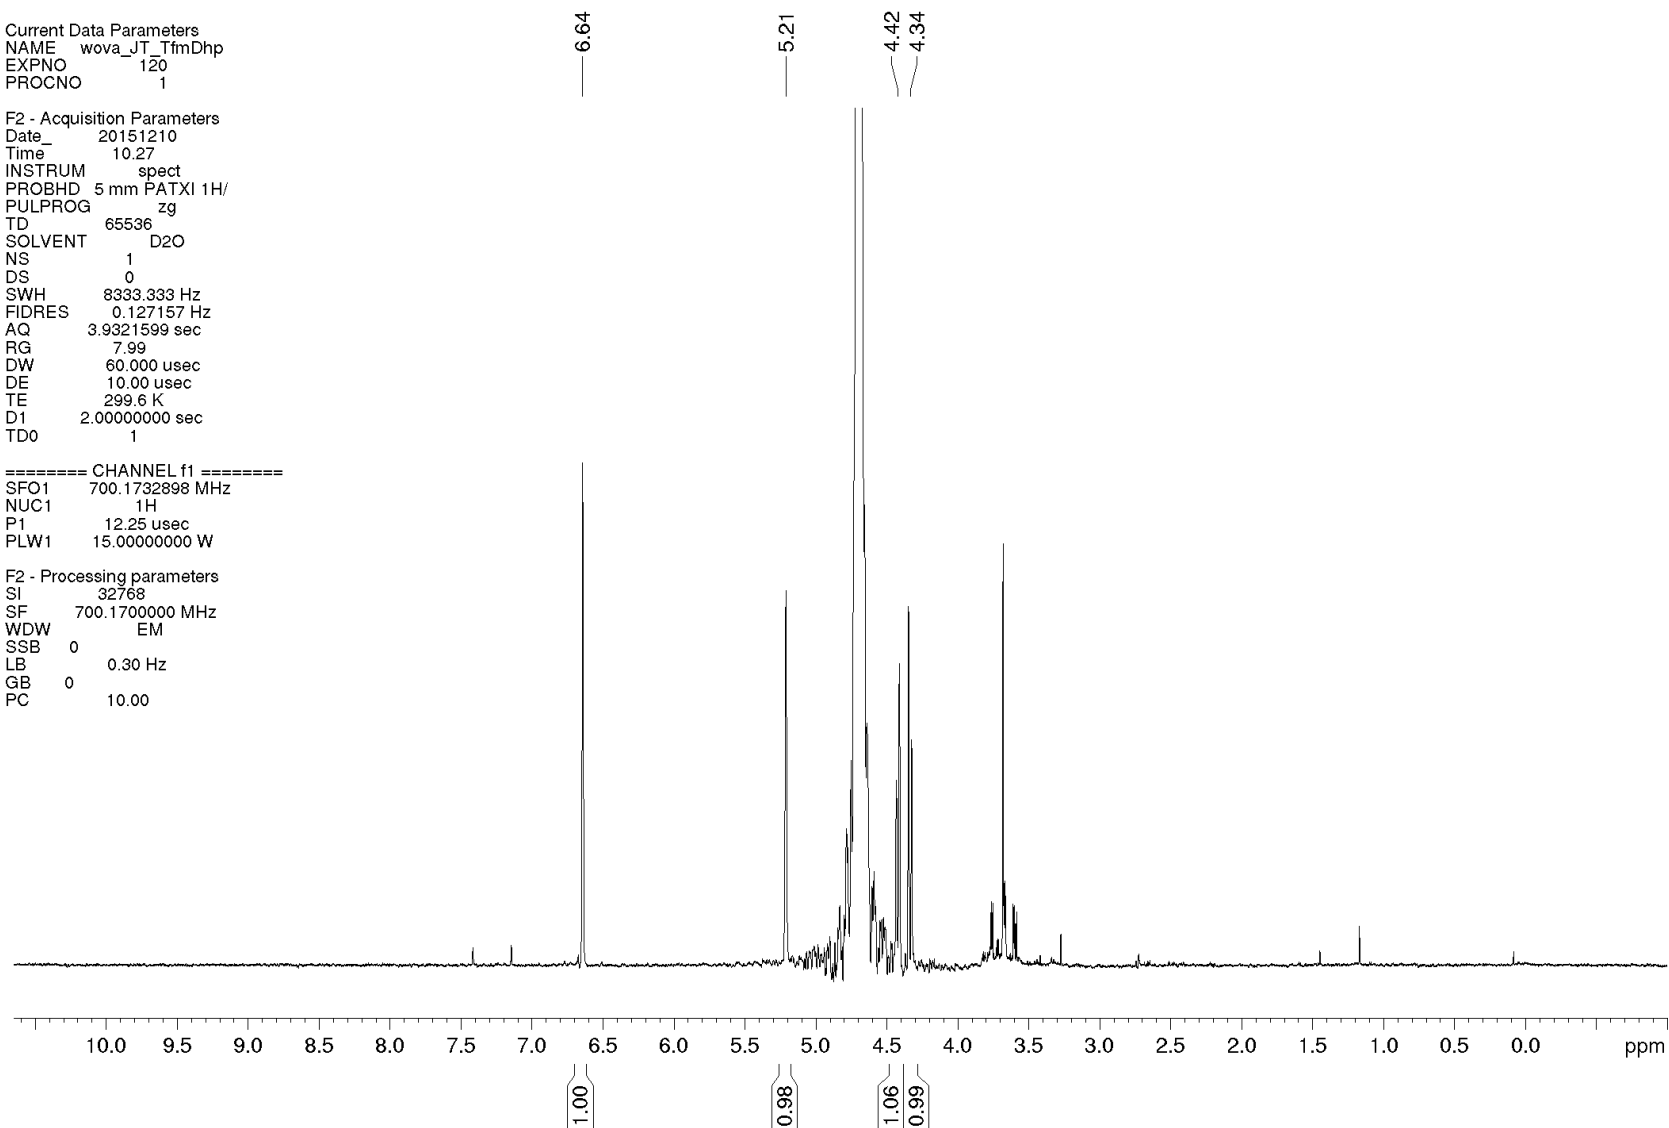

S16



$^{13}\text{C}\{^1\text{H}\}$  NMR spectrum of compound **4**\*HCl (HCl\*TfmDhp) in  $\text{D}_2\text{O}$

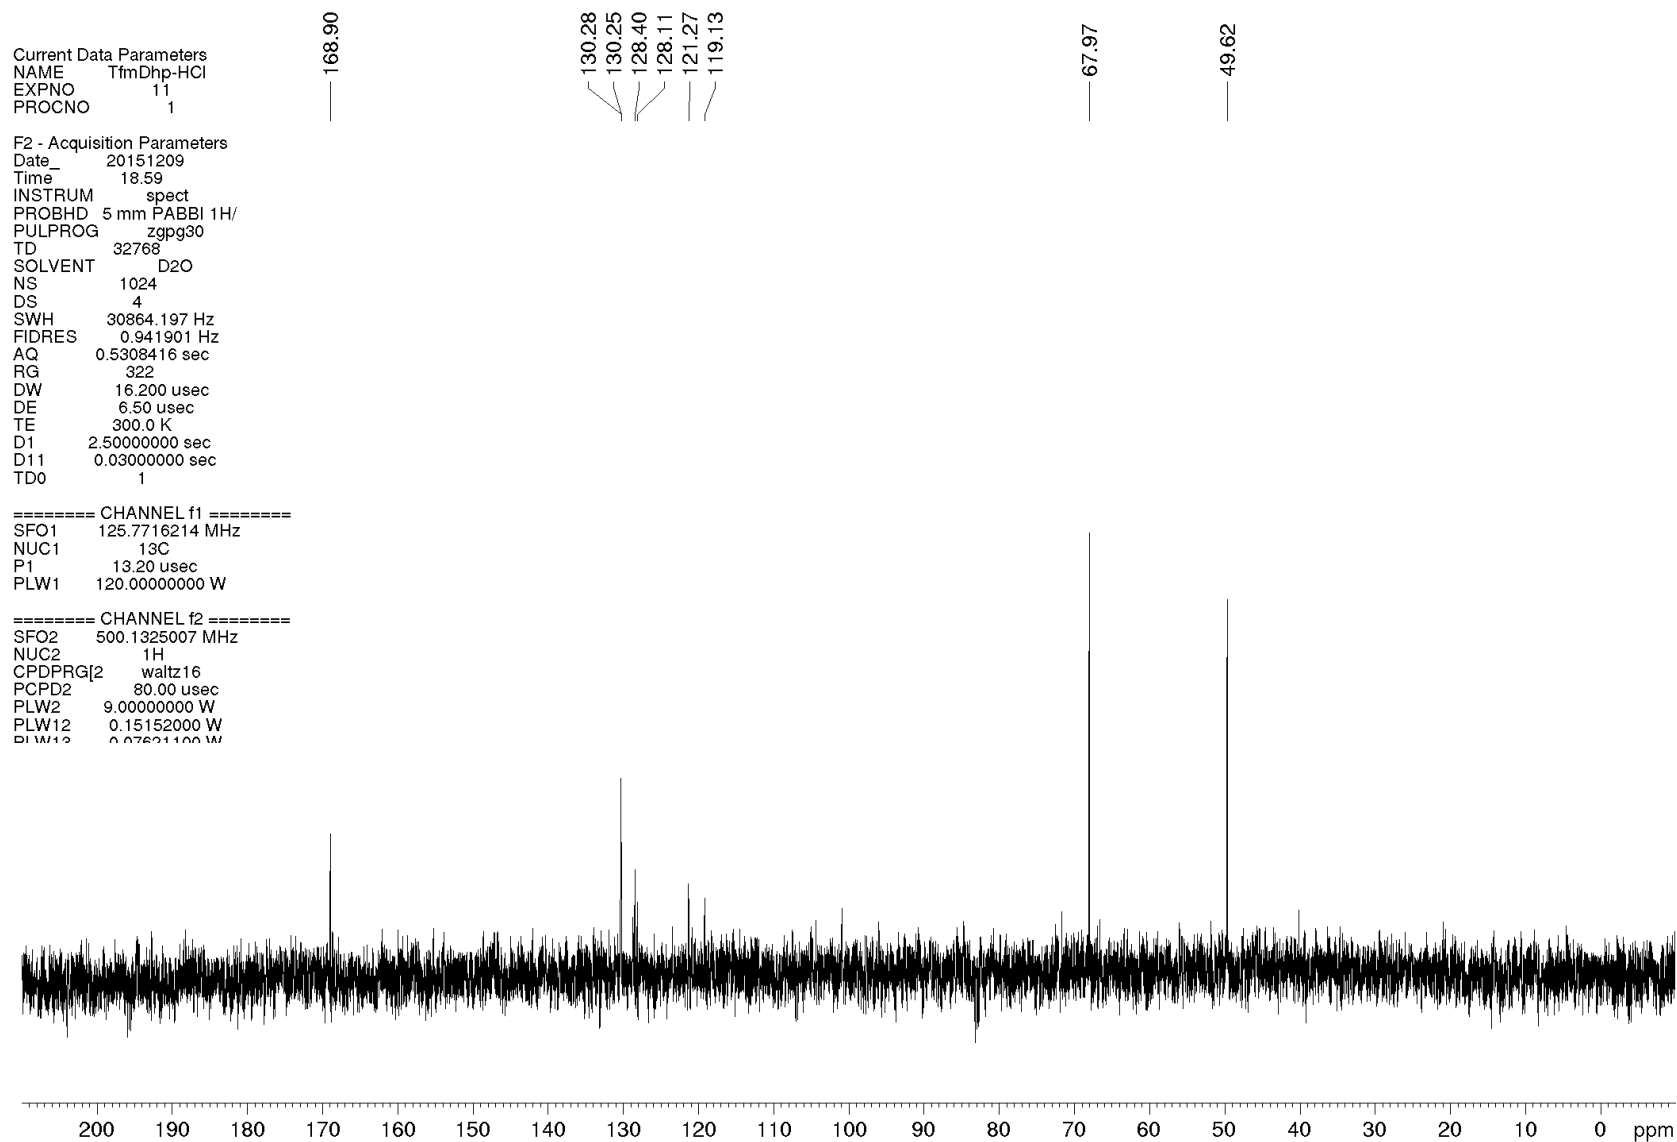

S17

<sup>19</sup>F NMR spectrum of compound **4**\*HCl (HCl\*TfmDhp) in D<sub>2</sub>O

Current Data Parameters  
NAME wova\_JT\_TfmDhp  
EXPNO 181  
PROCNO 1

F2 - Acquisition Parameters  
Date\_ 20151210  
Time 10.45  
INSTRUM spect  
PROBHD 5 mm PABBO BB/  
PULPROG zg  
TD 65536  
SOLVENT D2O  
NS 1  
DS 0  
SWH 33333.332 Hz  
FIDRES 0.508626 Hz  
AQ 0.9830400 sec  
RG 2050  
DW 15.000 usec  
DE 80.00 usec  
TE 298.0 K  
D1 2.50000000 sec  
TD0 1

===== CHANNEL f1 =====  
SFO1 470.6743524 MHz  
NUC1 19F  
P1 14.75 usec  
PLW1 42.00000000 W

F2 - Processing parameters  
SI 32768  
SF 470.7052900 MHz  
WDW EM  
SSB 0  
LB 0.30 Hz  
GB 0  
PC 1.00

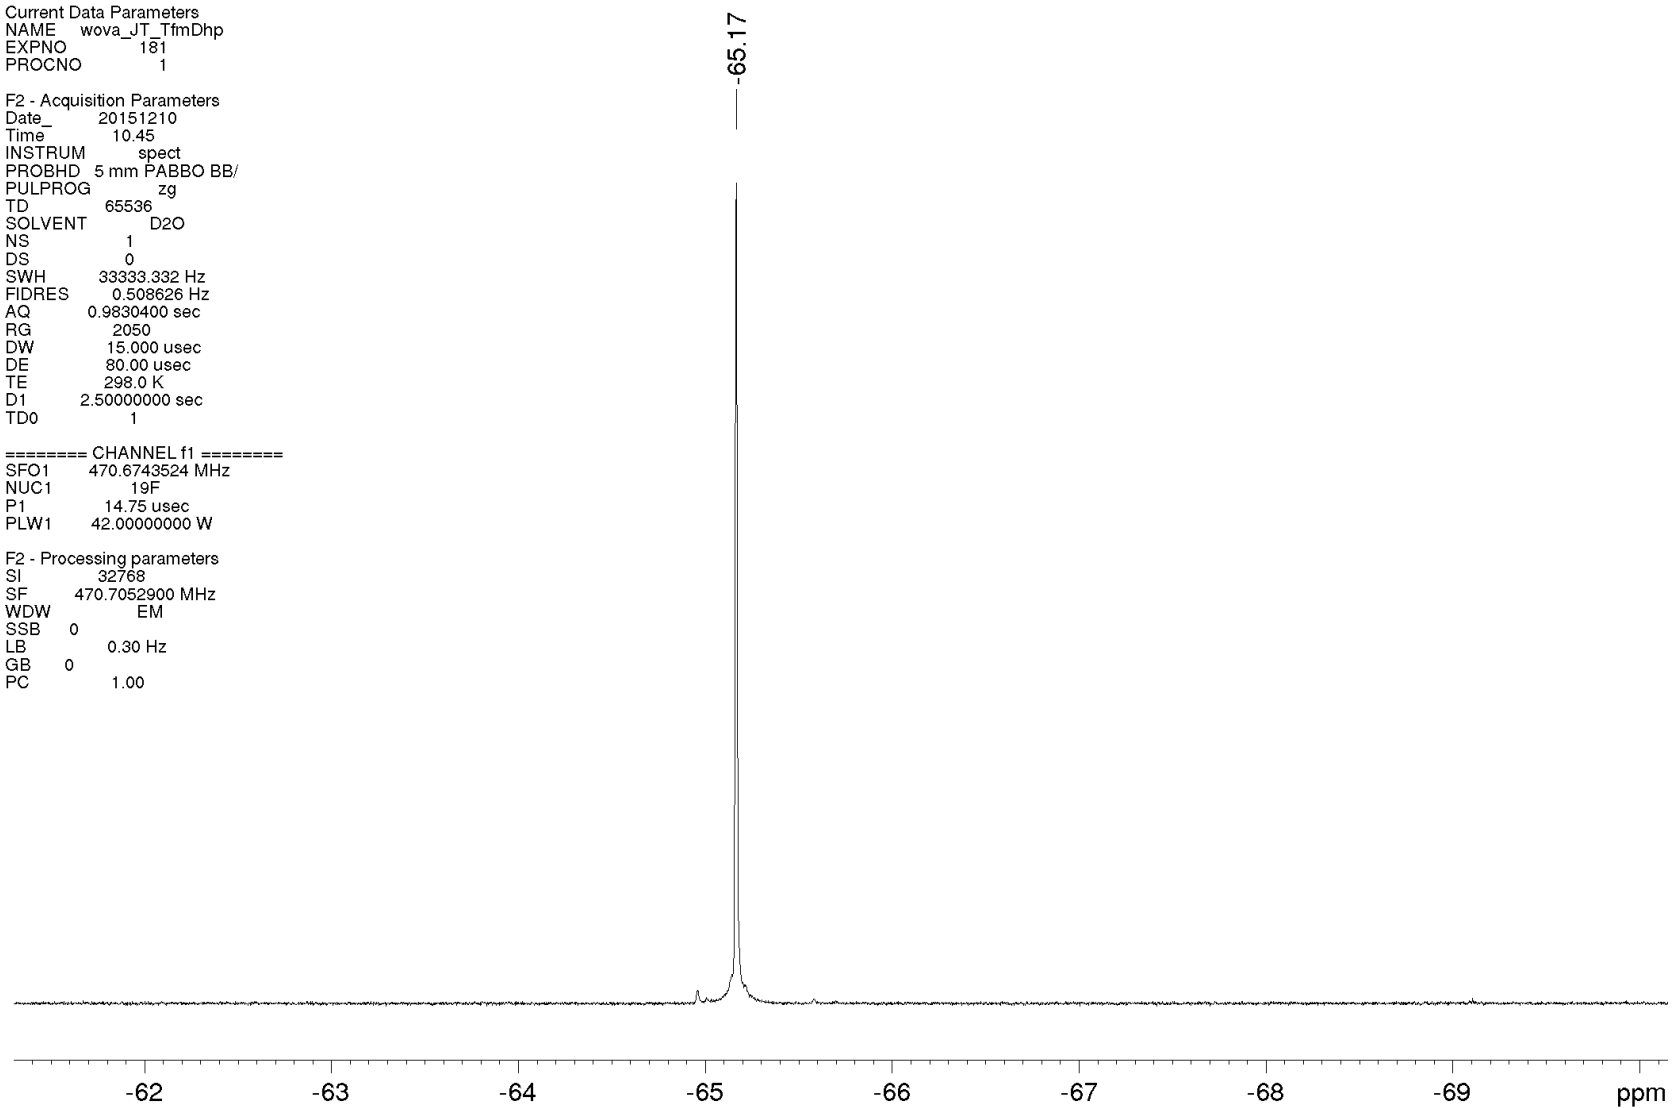

S18

<sup>1</sup>H NMR spectrum of Ac-TfmDhp-O<sup>-</sup> in D<sub>2</sub>O (buffer, pH 7)

Current Data Parameters  
NAME wova\_JT\_TfmDhp  
EXPNO 210  
PROCNO 1

F2 - Acquisition Parameters  
Date\_ 20151213  
Time 2.49  
INSTRUM spect  
PROBHD 5 mm PATXI 1H/  
PULPROG zg  
TD 65536  
SOLVENT D2O  
NS 1  
DS 0  
SWH 8333.333 Hz  
FIDRES 0.127157 Hz  
AQ 3.9321599 sec  
RG 88.07  
DW 60.000 usec  
DE 10.00 usec  
TE 299.6 K  
D1 2.00000000 sec  
TD0 1

===== CHANNEL f1 =====  
SFO1 700.1732898 MHz  
NUC1 1H  
P1 12.75 usec  
PLW1 15.00000000 W

F2 - Processing parameters  
SI 32768  
SF 700.1700000 MHz  
WDW GM  
SSB 0  
LB -0.50 Hz  
GB 0.1  
PC 10.00

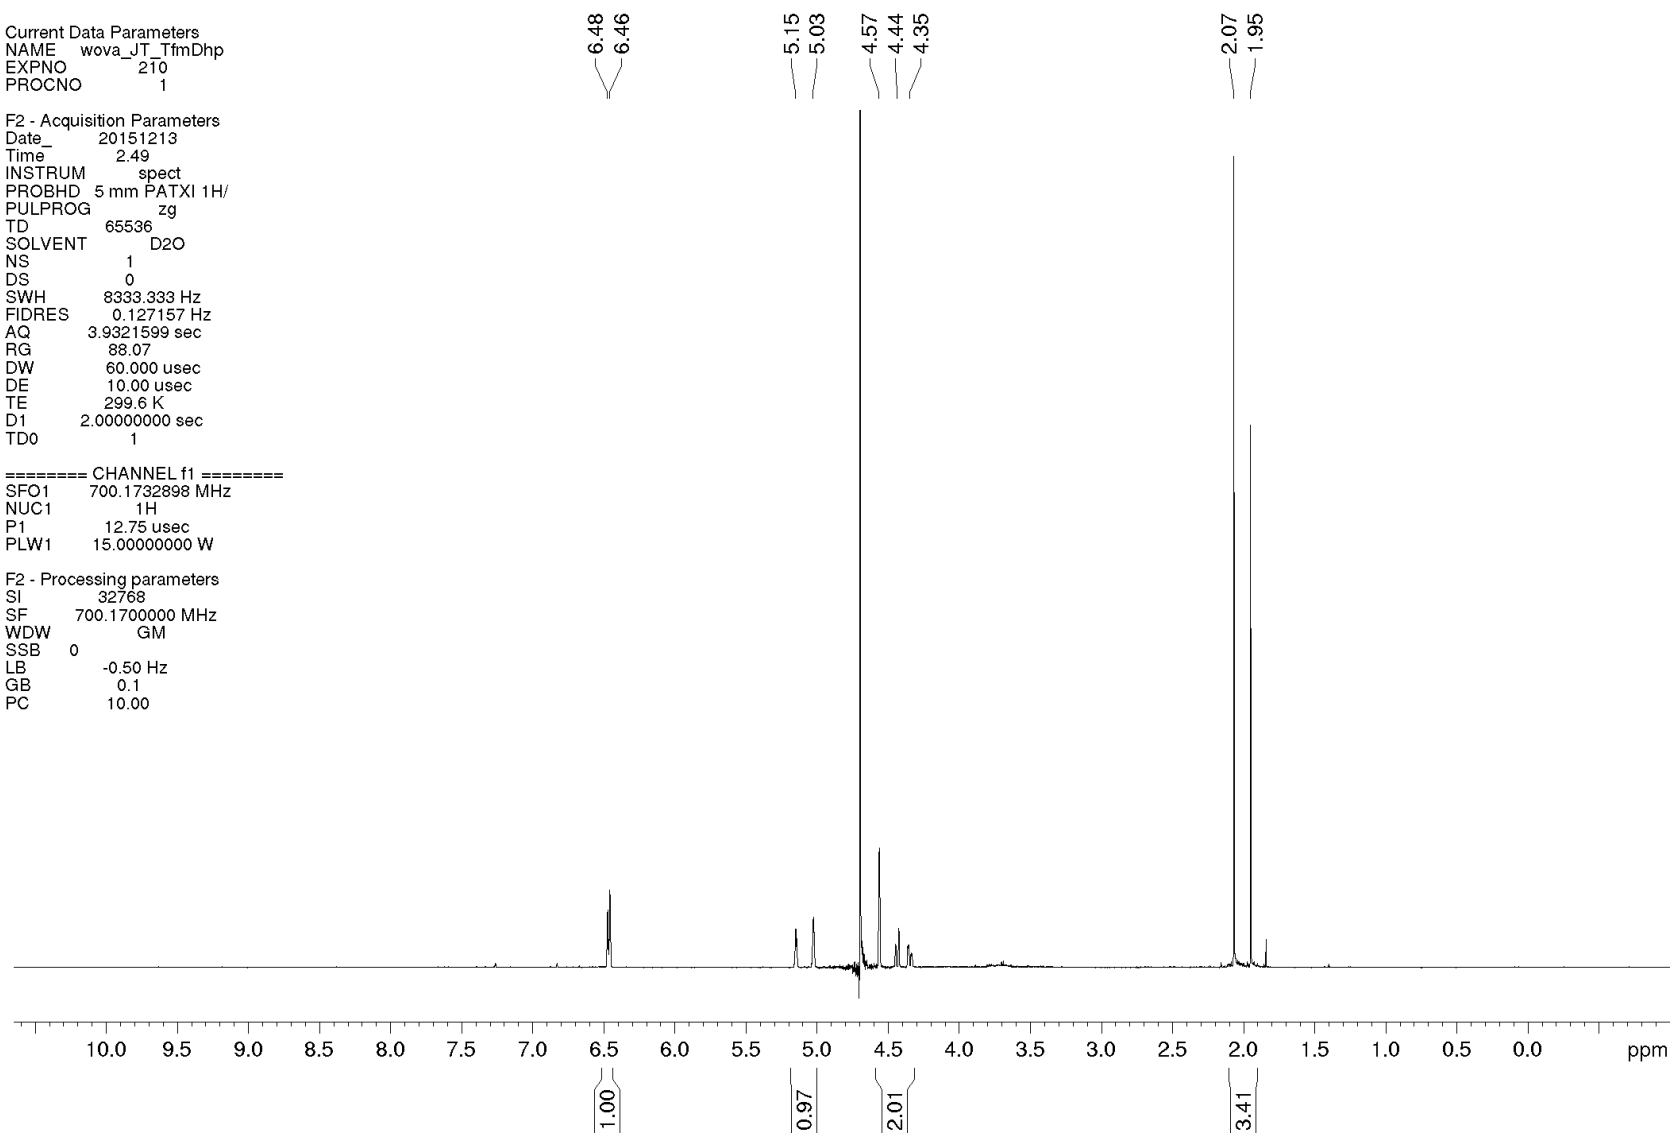

S19

$^{13}\text{C}\{^1\text{H}\}$  NMR spectrum of Ac-TfmDhp-O<sup>-</sup> in D<sub>2</sub>O (buffer, pH 7)

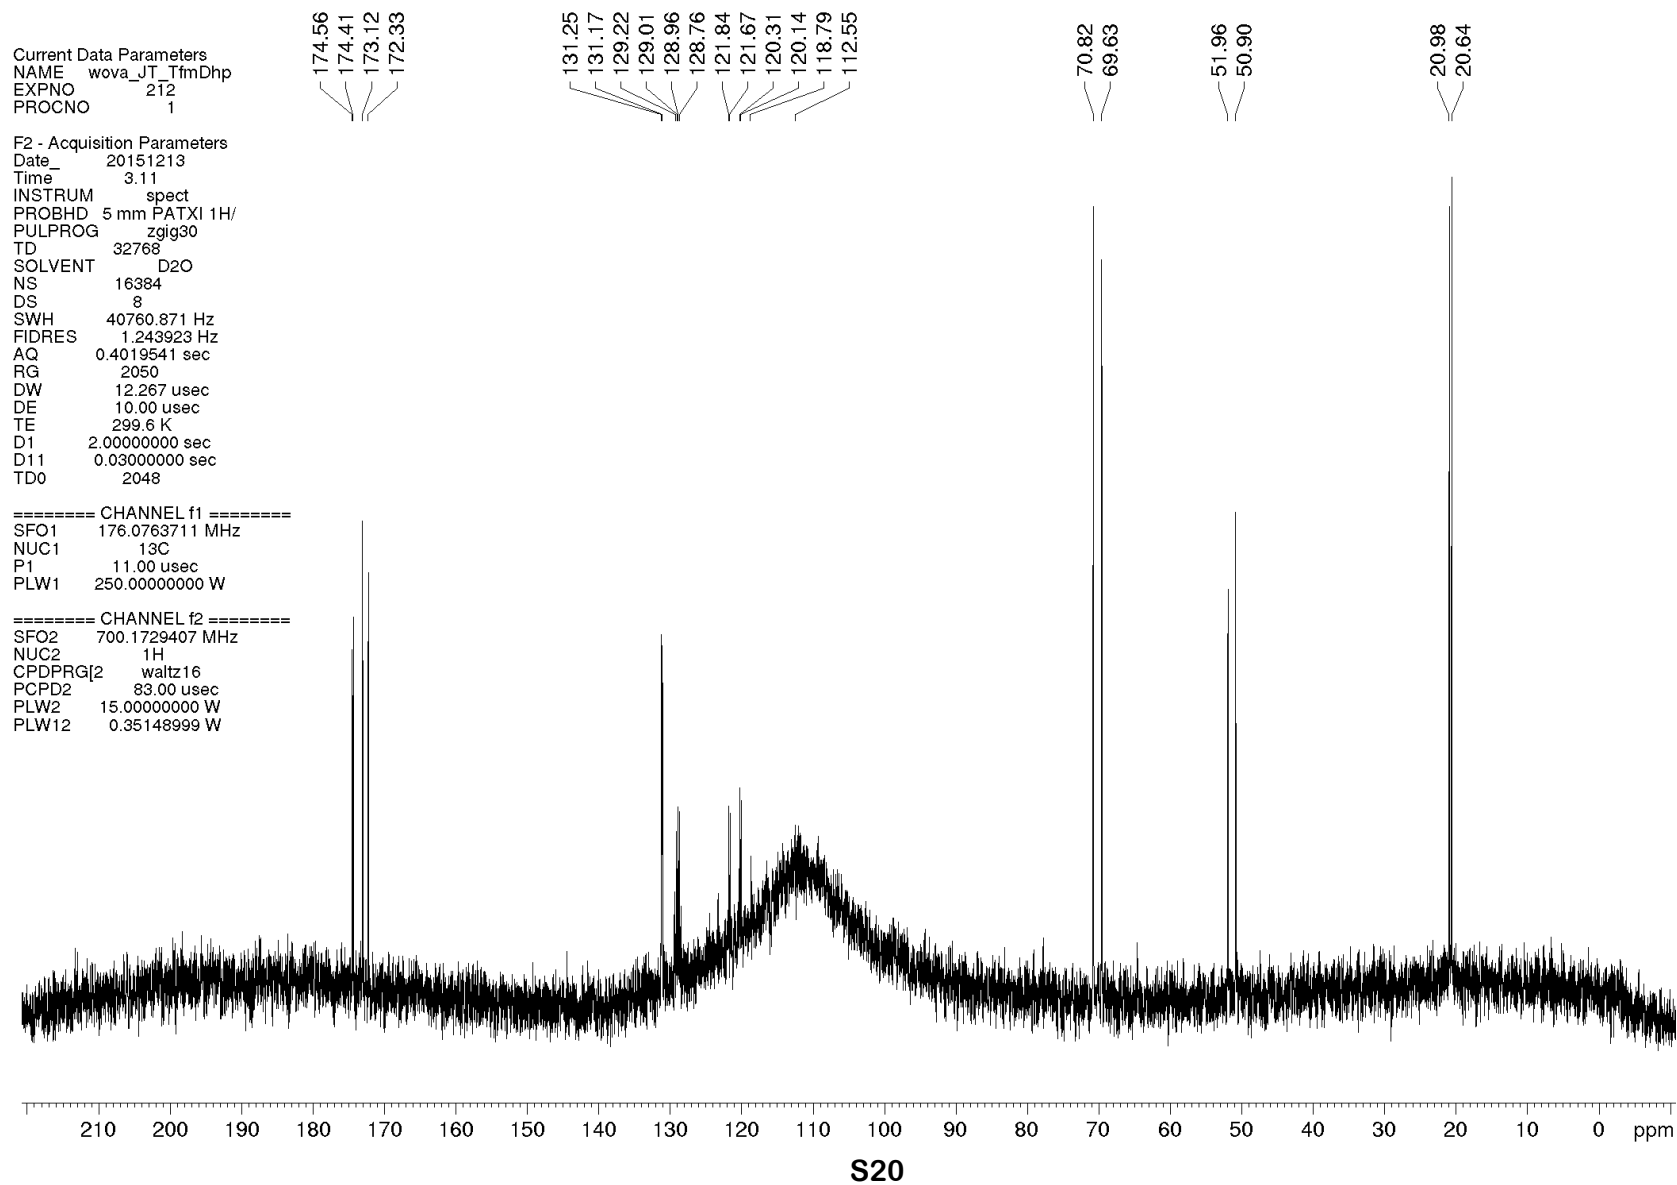

<sup>19</sup>F NMR spectrum of Ac-TfmDhp-O<sup>-</sup> in D<sub>2</sub>O (buffer, pH 7)

Current Data Parameters  
NAME wova\_JT\_TfmDhp  
EXPNO 190  
PROCNO 1

F2 - Acquisition Parameters  
Date\_ 20151212  
Time 20.48  
INSTRUM spect  
PROBHD 5 mm PATXI 1H/  
PULPROG zg  
TD 65536  
SOLVENT H<sub>2</sub>O+D<sub>2</sub>O  
NS 1  
DS 0  
SWH 32894.738 Hz  
FIDRES 0.501934 Hz  
AQ 0.9961472 sec  
RG 1290  
DW 15.200 usec  
DE 50.00 usec  
TE 299.6 K  
D1 1.00000000 sec  
TD0 1

===== CHANNEL f1 =====  
SFO1 658.7752138 MHz  
NUC1 <sup>19</sup>F  
P1 10.75 usec  
PLW1 15.00000000 W

F2 - Processing parameters  
SI 65536  
SF 658.8180370 MHz  
WDW EM  
SSB 0  
LB 1.00 Hz  
GB 0  
PC 10.00

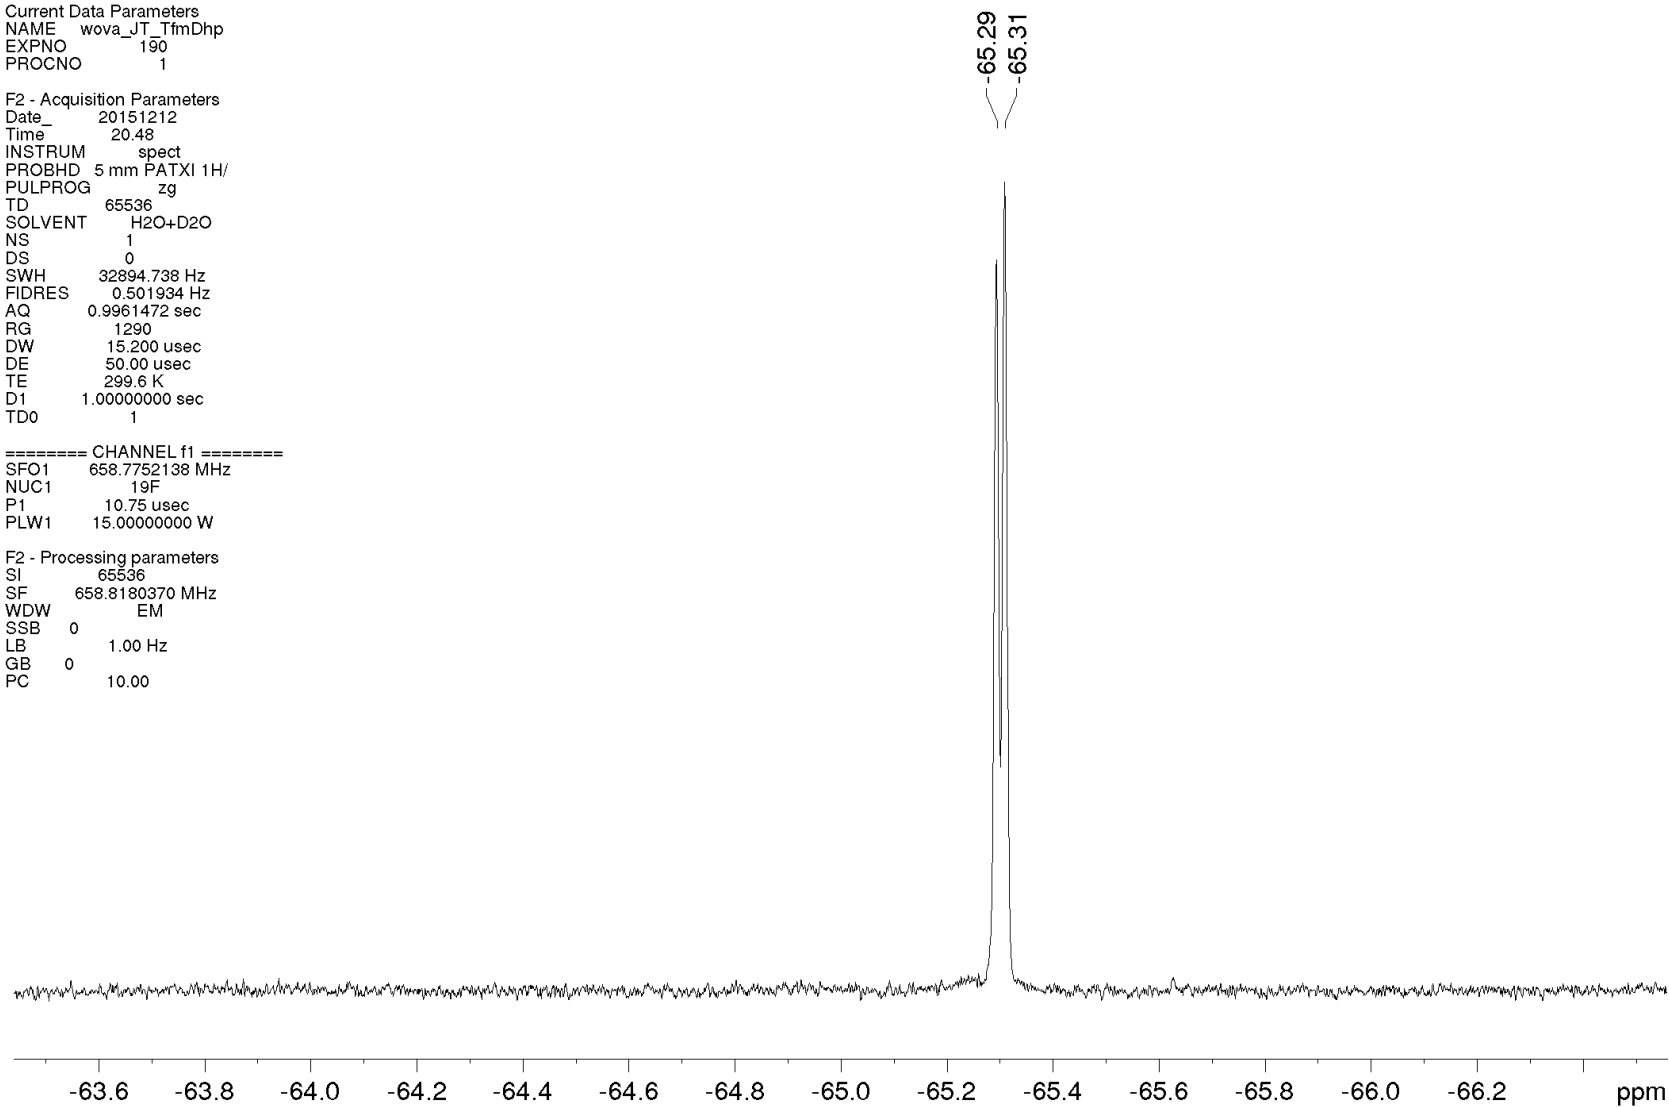

<sup>1</sup>H NMR spectrum of compound **6** (Ac-Dhp-OMe) in D<sub>2</sub>O

Current Data Parameters  
NAME wova\_Ac-Dhp-OMe  
EXPNO 70  
PROCNO 1

F2 - Acquisition Parameters  
Date\_ 20151117  
Time 10.46  
INSTRUM spect  
PROBHD 5 mm PATXI 1H/  
PULPROG zg  
TD 65536  
SOLVENT D2O  
NS 1  
DS 0  
SWH 8333.333 Hz  
FIDRES 0.127157 Hz  
AQ 3.9321599 sec  
RG 74.88  
DW 60.000 usec  
DE 10.00 usec  
TE 298.0 K  
D1 1.00000000 sec  
TD0 1

===== CHANNEL f1 =====  
SFO1 700.1732908 MHz  
NUC1 1H  
P1 10.00 usec  
PLW1 15.00000000 W

F2 - Processing parameters  
SI 65536  
SF 700.1700000 MHz  
WDW EM  
SSB 0  
LB 0.20 Hz  
GB 0  
PC 10.00

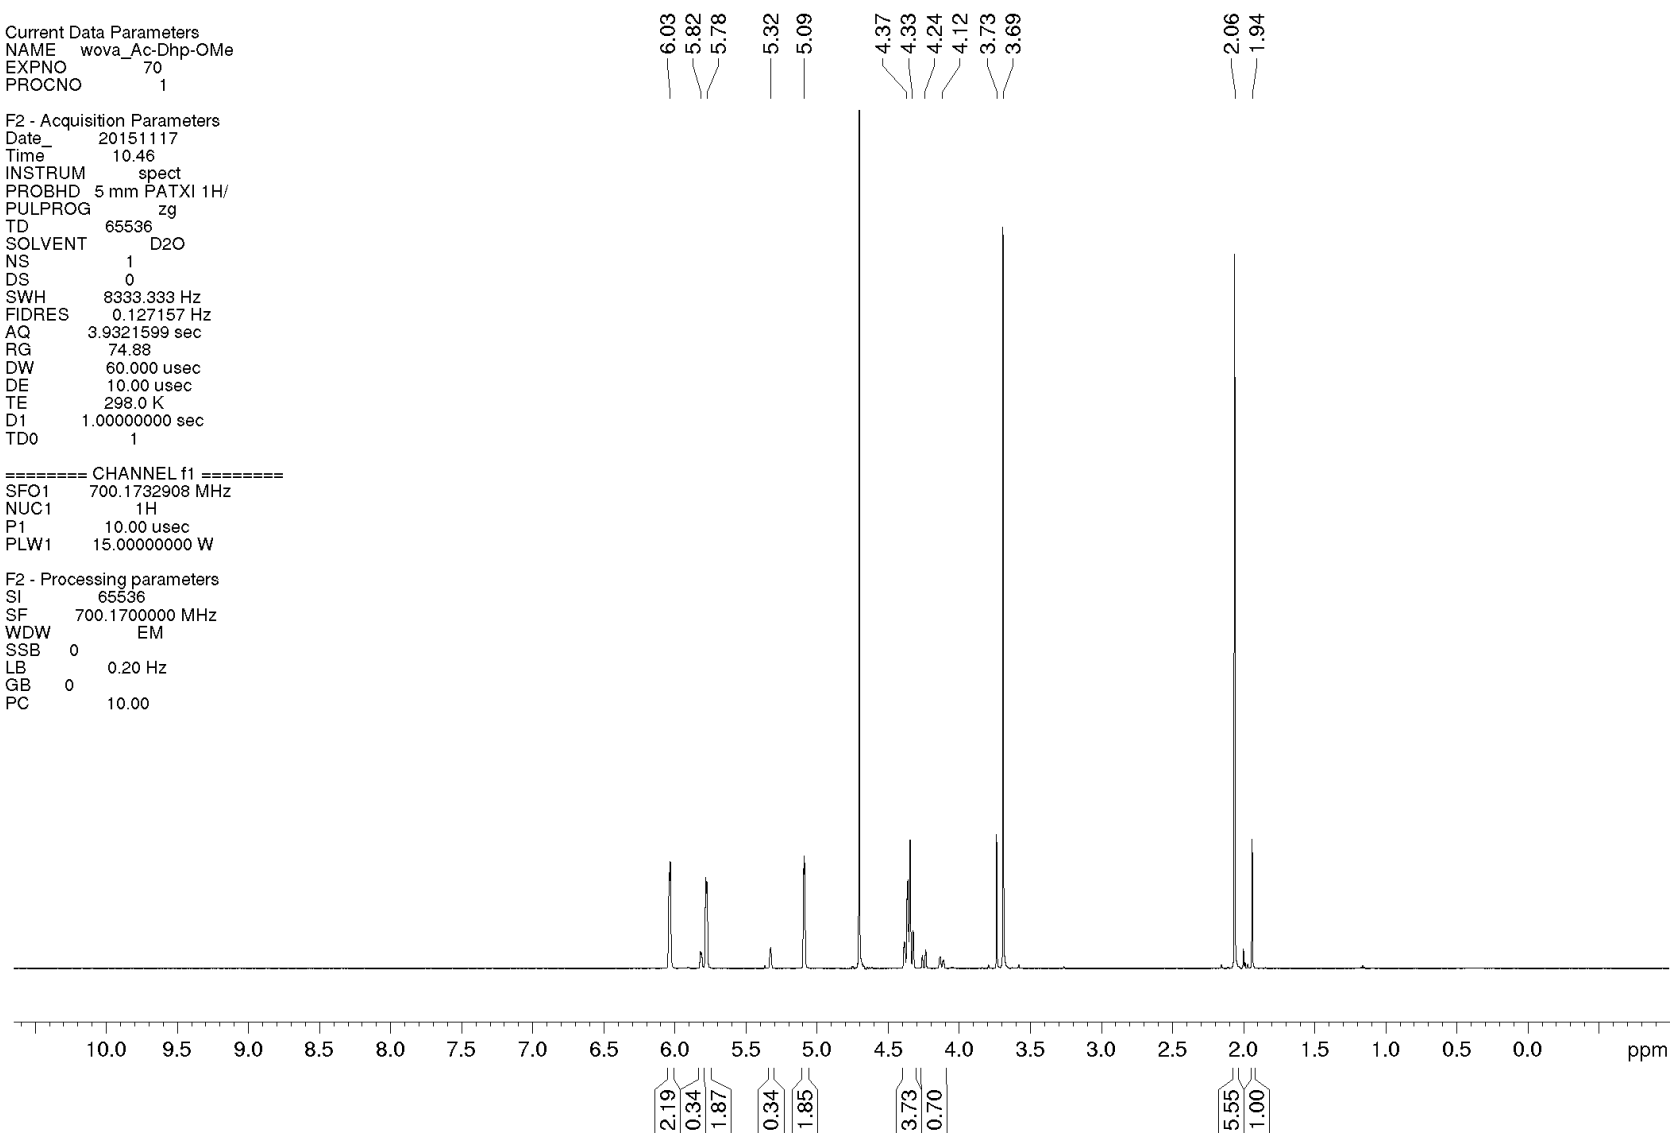

S22

$^{13}\text{C}\{^1\text{H}\}$  NMR spectrum of compound **6** (Ac-Dhp-OMe) in  $\text{D}_2\text{O}$

Current Data Parameters  
NAME wova\_Ac-Dhp-OMe  
EXPNO 178  
PROCNO 1

F2 - Acquisition Parameters  
Date\_ 20151113  
Time 21.05  
INSTRUM spect  
PROBHD 5 mm PABBO BB/  
PULPROG zgig30  
TD 32768  
SOLVENT D2O  
NS 16384  
DS 4  
SWH 29411.766 Hz  
FIDRES 0.897576 Hz  
AQ 0.5570560 sec  
RG 1620  
DW 17.000 usec  
DE 10.00 usec  
TE 298.0 K  
D1 2.00000000 sec  
D11 0.03000000 sec  
TD0 2048

===== CHANNEL f1 =====  
SFO1 125.8011698 MHz  
NUC1  $^{13}\text{C}$   
P1 9.88 usec  
PLW1 101.00000000 W

===== CHANNEL f2 =====  
SFO2 500.2523512 MHz  
NUC2  $^1\text{H}$   
CPDPRG2 waltz16  
PCPD2 80.00 usec  
PLW2 15.00000000 W  
PLW12 0.33750001 W

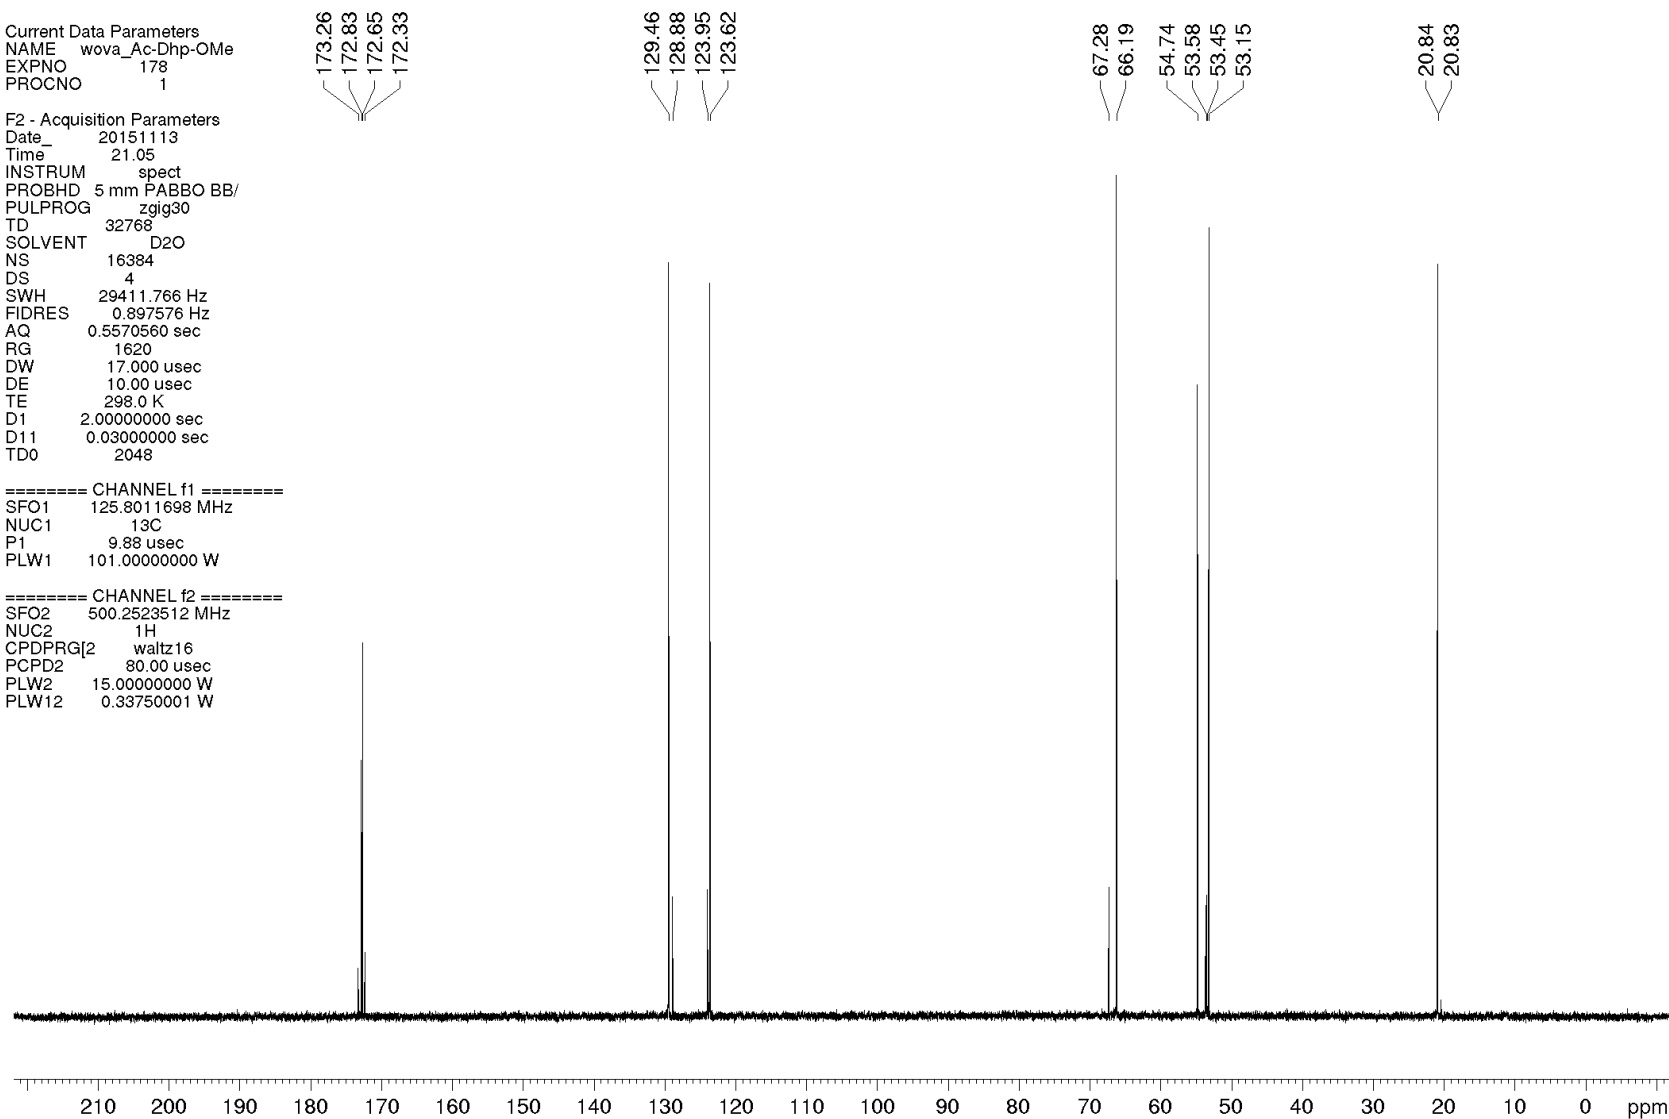

<sup>1</sup>H NMR spectrum of Ac-Dhp-O<sup>-</sup> in D<sub>2</sub>O (buffer, pH 7)

Current Data Parameters  
NAME wova\_Ac-Dhp-OMe  
EXPNO 112  
PROCNO 1

F2 - Acquisition Parameters  
Date\_ 20151212  
Time 0.04  
INSTRUM spect  
PROBHD 5 mm PATXI 1H/  
PULPROG zg  
TD 65536  
SOLVENT D2O  
NS 1  
DS 0  
SWH 8333.333 Hz  
FIDRES 0.127157 Hz  
AQ 3.9321599 sec  
RG 55.01  
DW 60.000 usec  
DE 10.00 usec  
TE 299.6 K  
D1 1.00000000 sec  
TD0 1

===== CHANNEL f1 =====  
SFO1 700.1732908 MHz  
NUC1 1H  
P1 14.00 usec  
PLW1 15.00000000 W

F2 - Processing parameters  
SI 65536  
SF 700.1700000 MHz  
WDW EM  
SSB 0  
LB 0.30 Hz  
GB 0  
PC 10.00

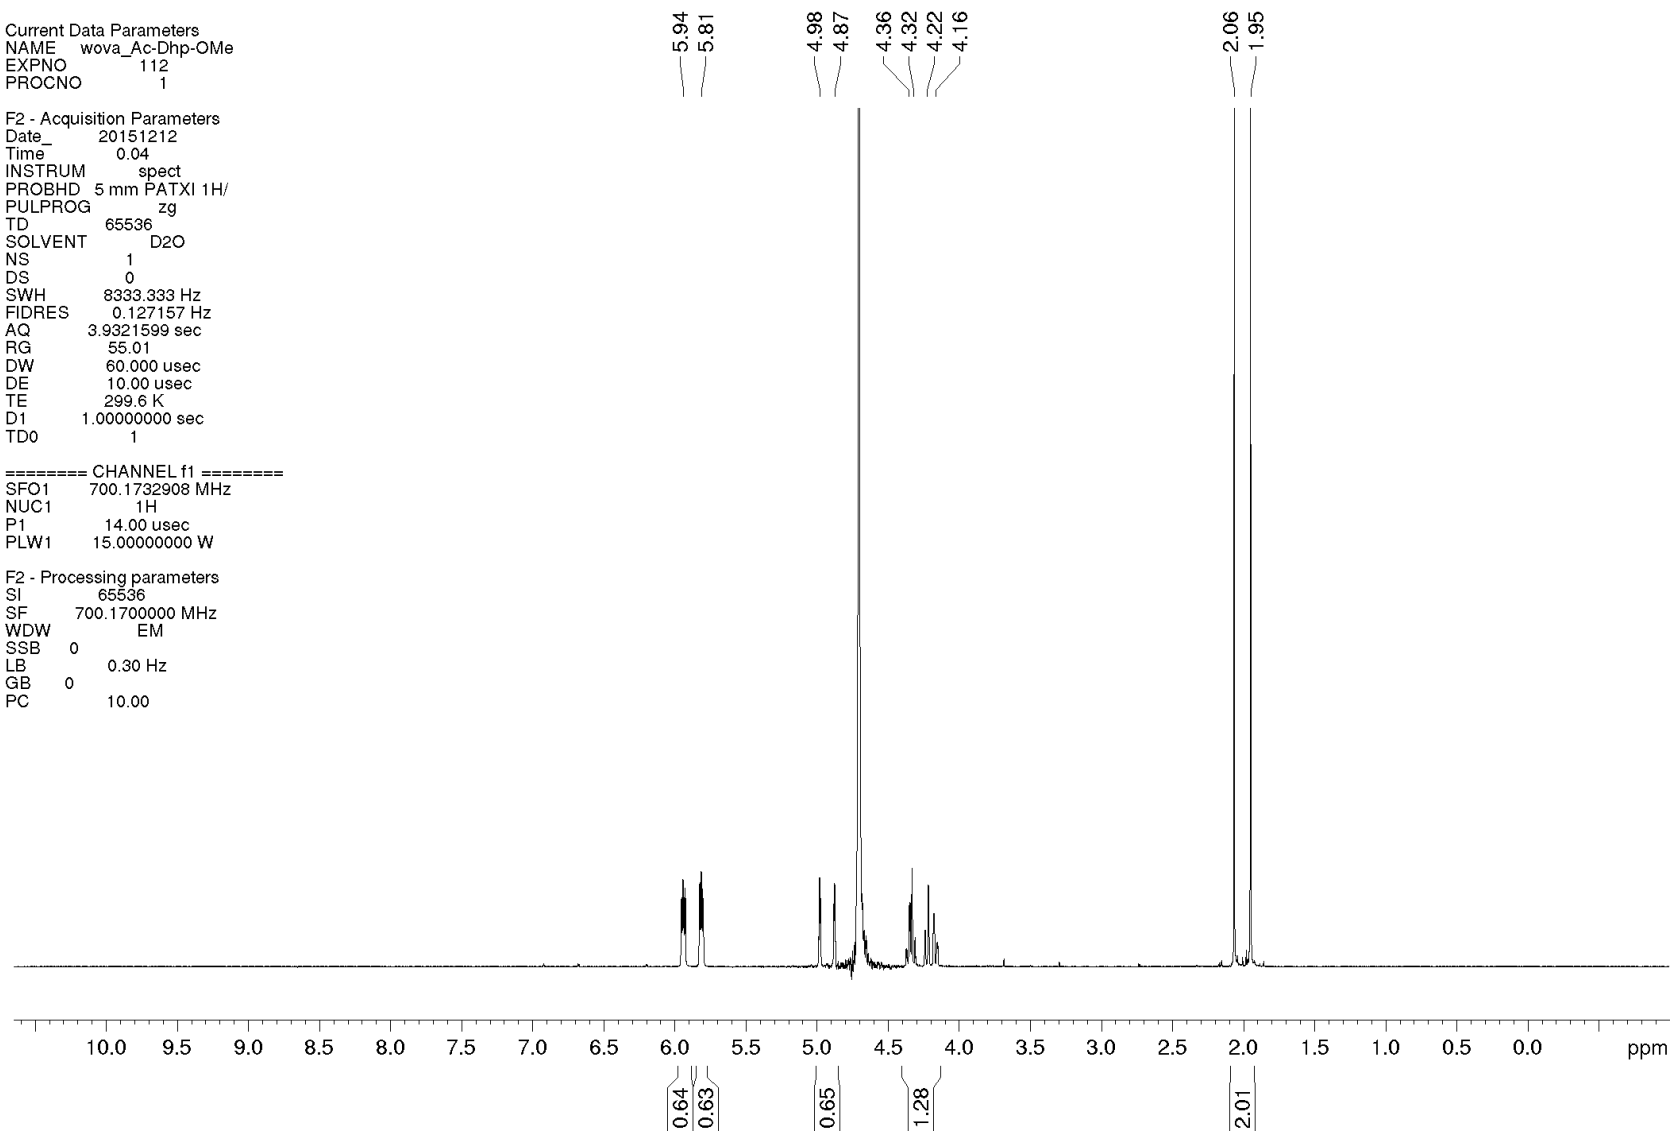

S24



$^{13}\text{C}\{^1\text{H}\}$  NMR spectrum of Ac-Dhp-O<sup>-</sup> in D<sub>2</sub>O (buffer, pH 7)

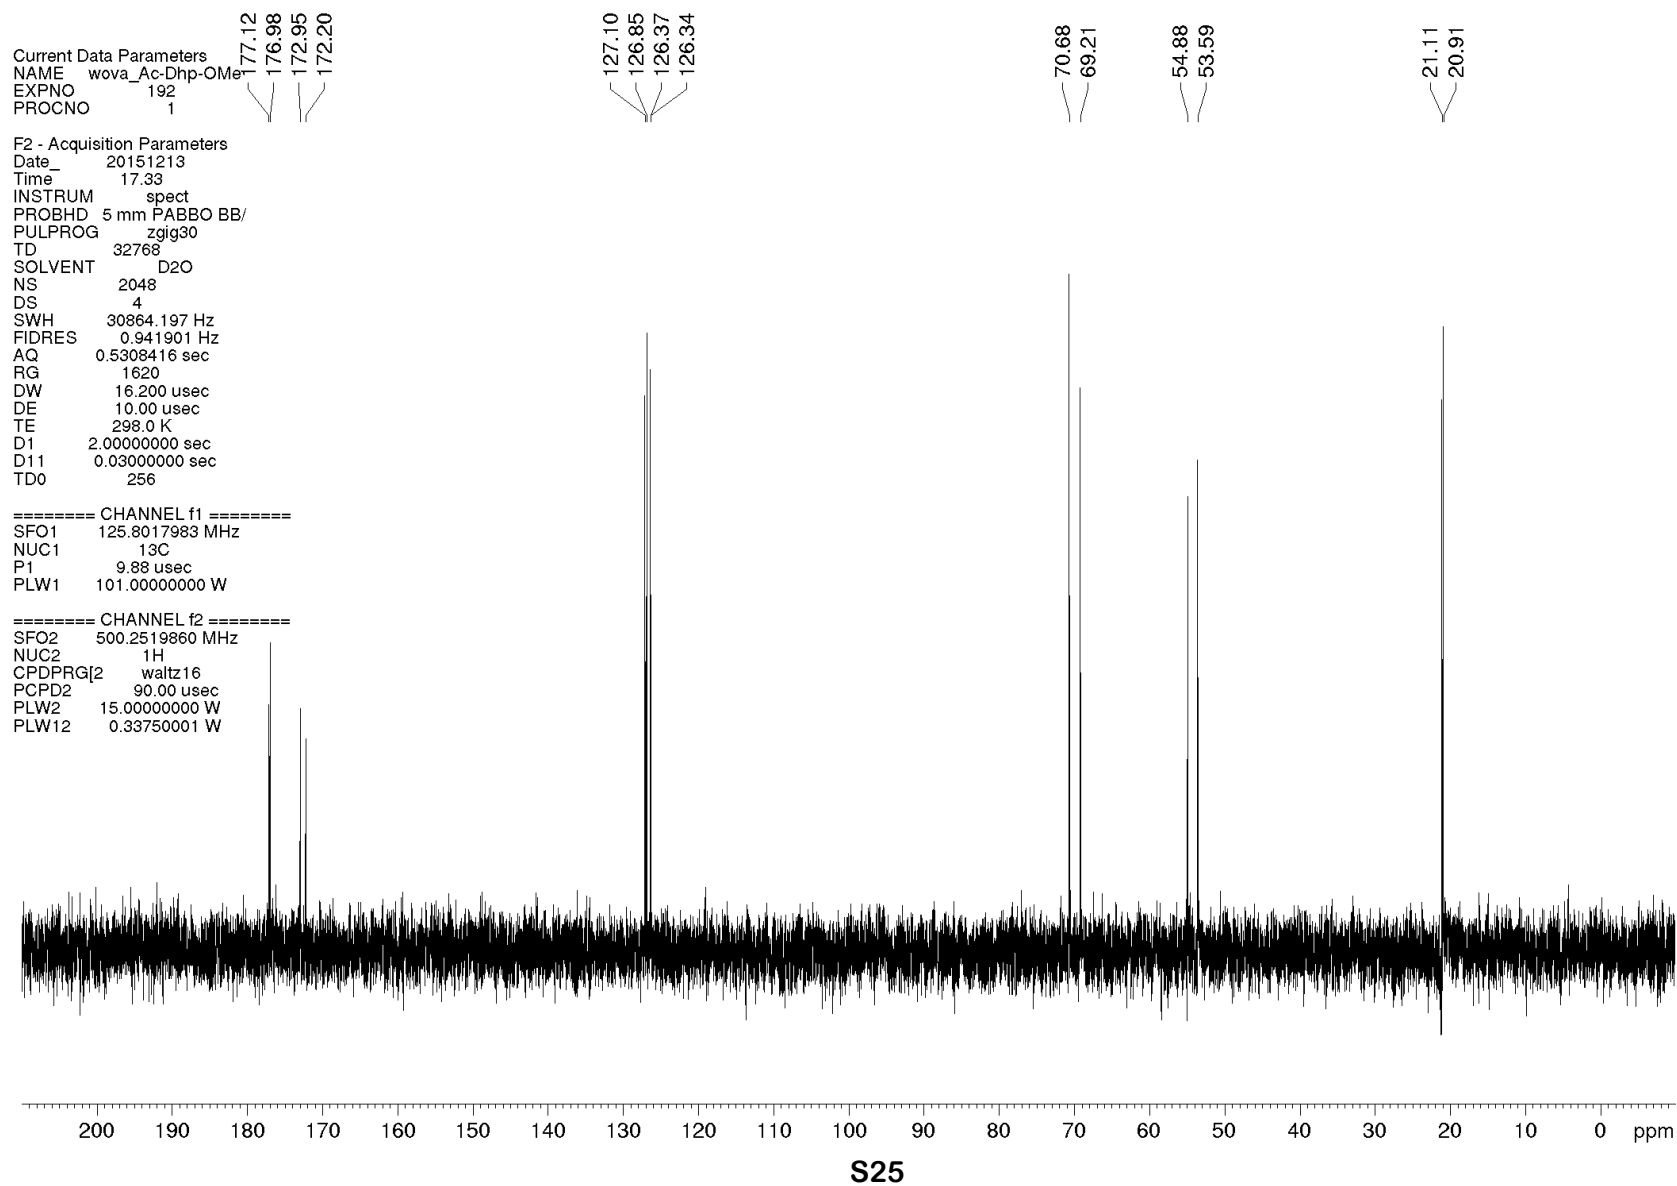

<sup>1</sup>H NMR spectrum of HCl\*TfmDhp-OMe in D<sub>2</sub>O

Current Data Parameters  
NAME wova\_JT\_TfmDhp  
EXPNO 140  
PROCNO 1

F2 - Acquisition Parameters  
Date\_ 20151210  
Time 11.05  
INSTRUM spect  
PROBHD 5 mm PATXI 1H/  
PULPROG zg  
TD 65536  
SOLVENT D2O  
NS 1  
DS 0  
SWH 8333.333 Hz  
FIDRES 0.127157 Hz  
AQ 3.9321599 sec  
RG 194.19  
DW 60.000 usec  
DE 10.00 usec  
TE 299.6 K  
D1 2.00000000 sec  
TD0 1

===== CHANNEL f1 =====  
SFO1 700.1732898 MHz  
NUC1 1H  
P1 11.00 usec  
PLW1 15.00000000 W

F2 - Processing parameters  
SI 32768  
SF 700.1700000 MHz  
WDW EM  
SSB 0  
LB 0.30 Hz  
GB 0  
PC 10.00

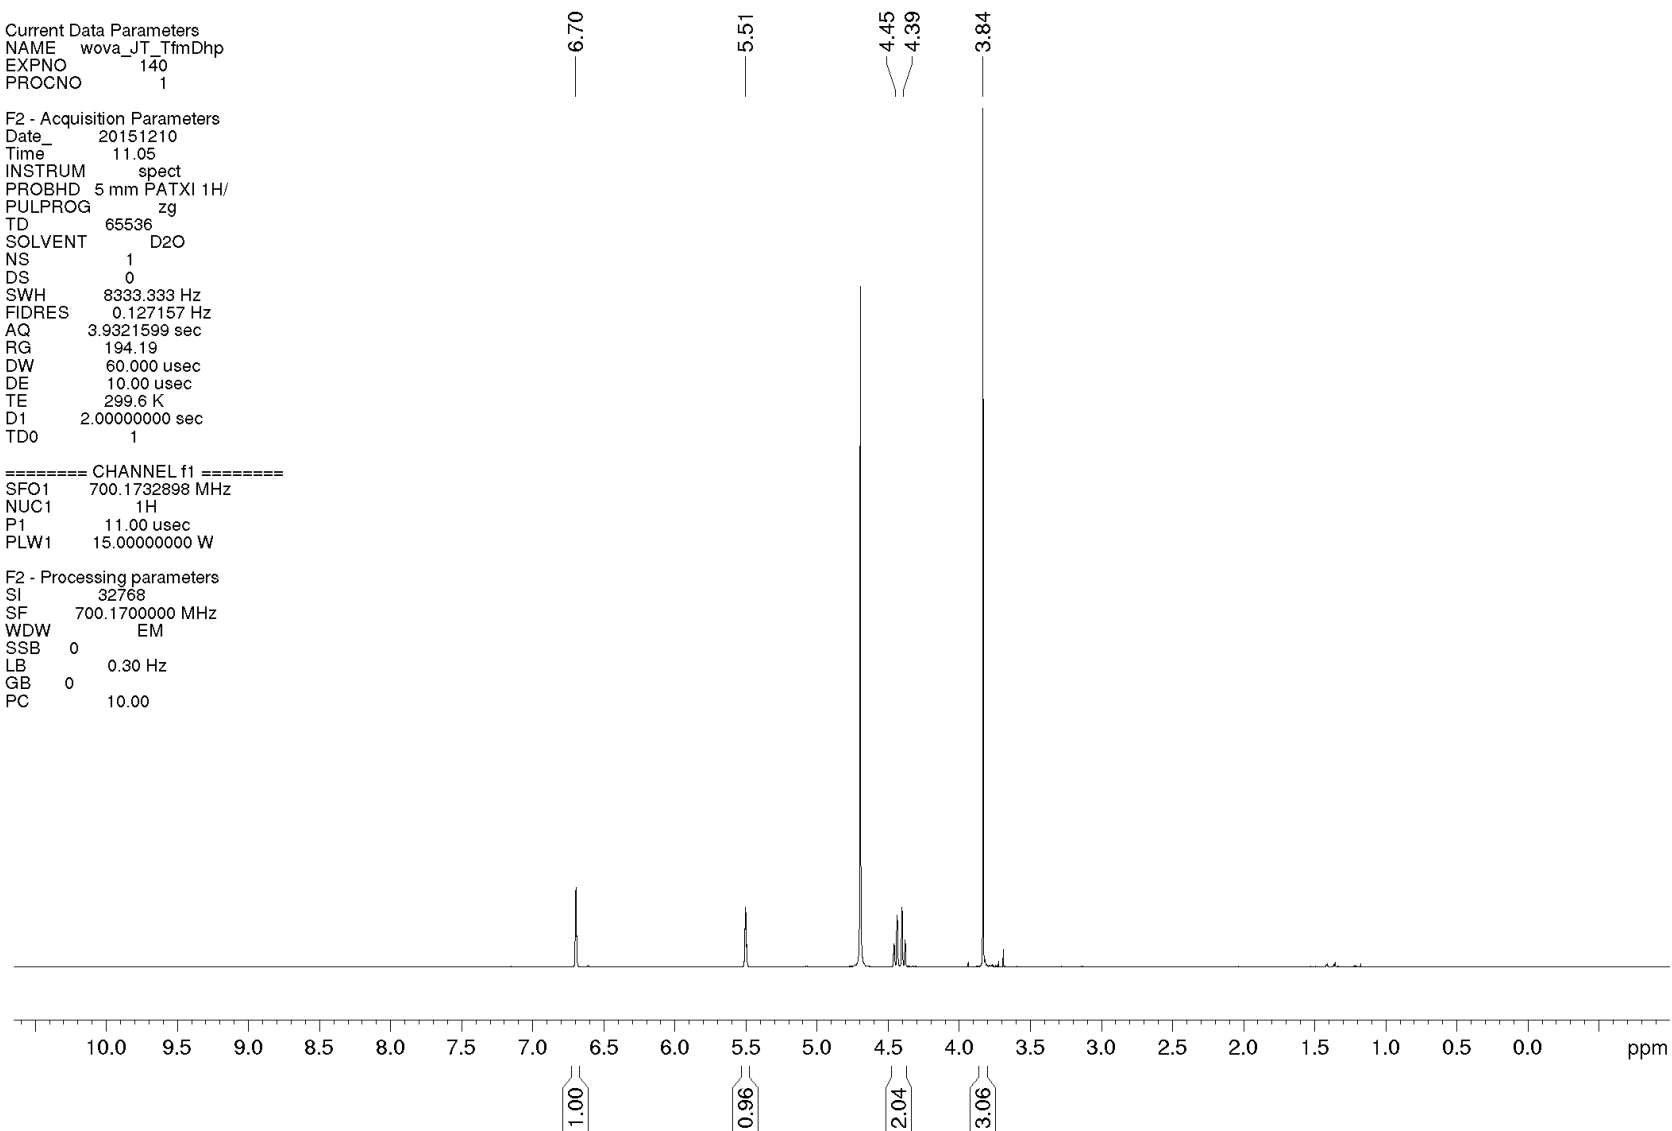

S26

<sup>19</sup>F NMR spectrum of HCl\*TfmDhp-OMe in D<sub>2</sub>O

Current Data Parameters  
NAME wova\_JT\_TfmDhp  
EXPNO 181  
PROCNO 1

F2 - Acquisition Parameters  
Date\_ 20151210  
Time 10.45  
INSTRUM spect  
PROBHD 5 mm PABBO BB/  
PULPROG zg  
TD 65536  
SOLVENT D2O  
NS 1  
DS 0  
SWH 33333.332 Hz  
FIDRES 0.508626 Hz  
AQ 0.9830400 sec  
RG 2050  
DW 15.000 usec  
DE 80.00 usec  
TE 298.0 K  
D1 2.50000000 sec  
TD0 1

===== CHANNEL f1 =====  
SFO1 470.6743524 MHz  
NUC1 19F  
P1 14.75 usec  
PLW1 42.00000000 W

F2 - Processing parameters  
SI 32768  
SF 470.7052900 MHz  
WDW EM  
SSB 0  
LB 0.30 Hz  
GB 0  
PC 1.00

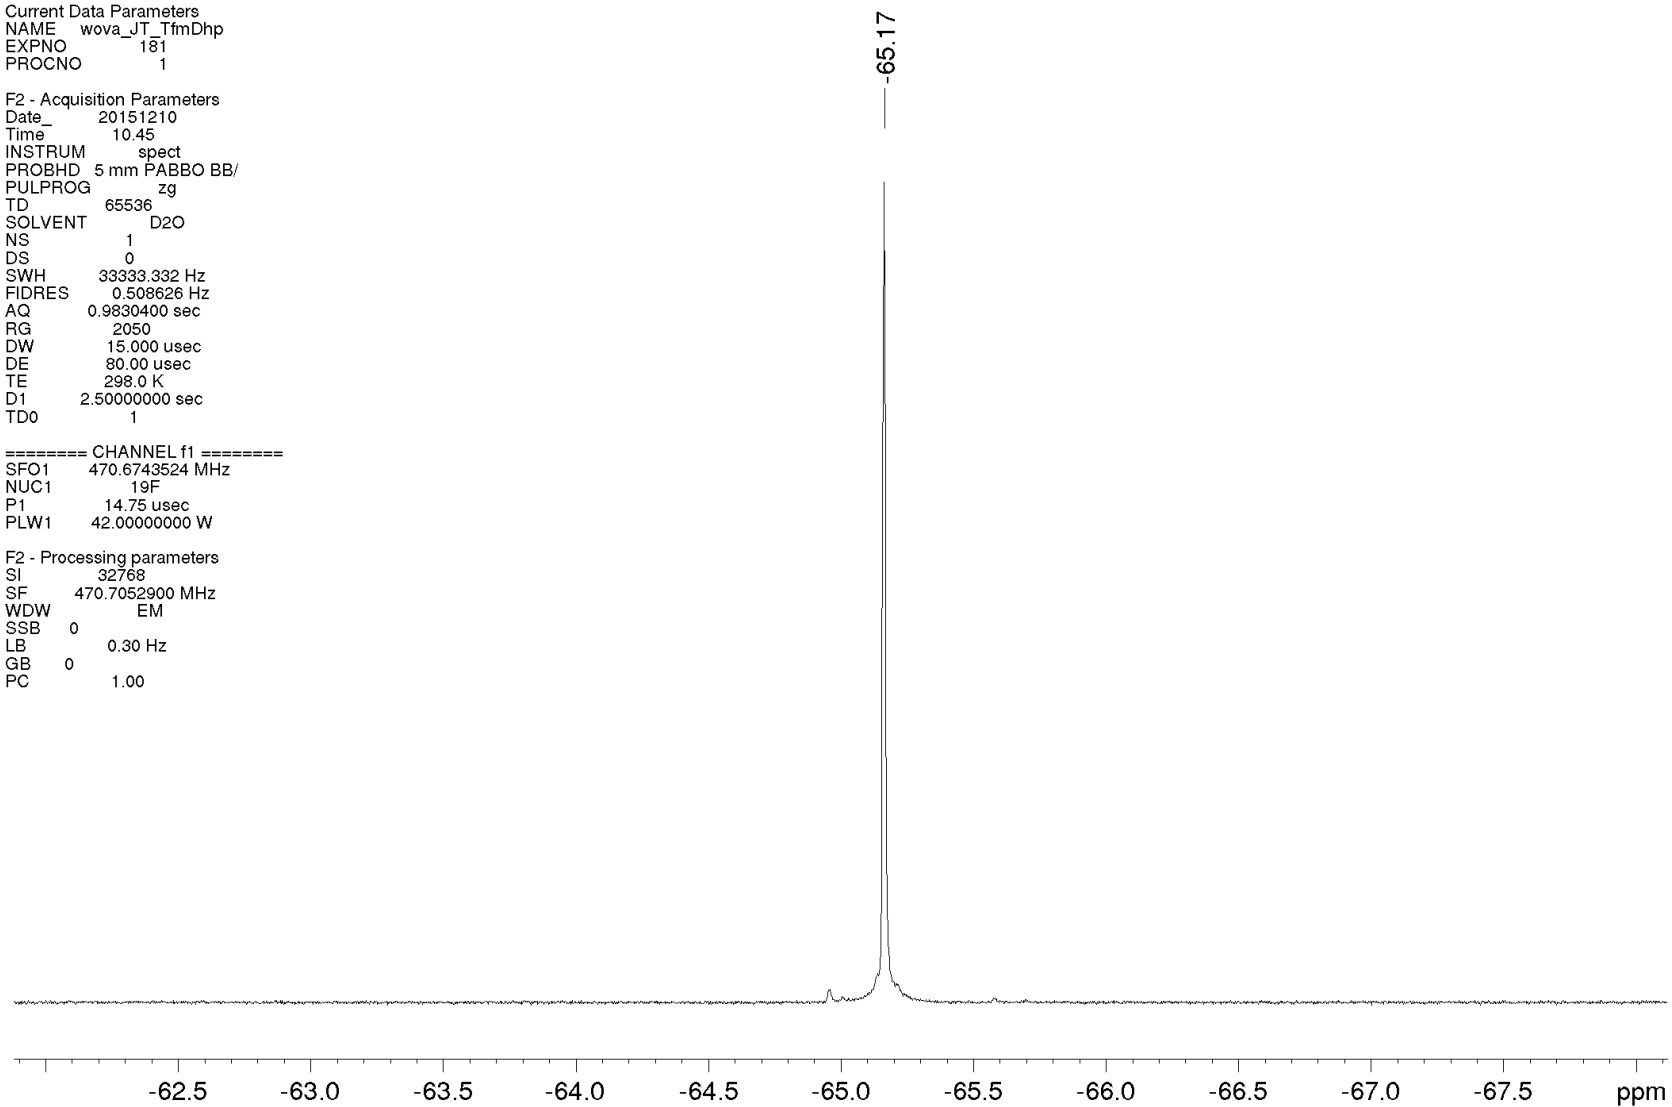

S27

<sup>1</sup>H NMR spectrum of compound **8** (Ac-TfmDhp-OMe) in D<sub>2</sub>O

Current Data Parameters  
NAME wova\_JT\_TfmDhp  
EXPNO 90  
PROCNO 1

F2 - Acquisition Parameters  
Date\_ 20150325  
Time 18.01  
INSTRUM spect  
PROBHD 5 mm PATXI 1H/  
PULPROG zg  
TD 65536  
SOLVENT D2O  
NS 1  
DS 0  
SWH 8333.333 Hz  
FIDRES 0.127157 Hz  
AQ 3.9321599 sec  
RG 15.98  
DW 60.000 usec  
DE 10.00 usec  
TE 298.0 K  
D1 2.0000000 sec  
TD0 1

===== CHANNEL f1 =====  
SFO1 700.1732898 MHz  
NUC1 1H  
P1 10.25 usec  
PLW1 15.00000000 W

F2 - Processing parameters  
SI 32768  
SF 700.1700000 MHz  
WDW EM  
SSB 0  
LB 0.30 Hz  
GB 0  
PC 10.00

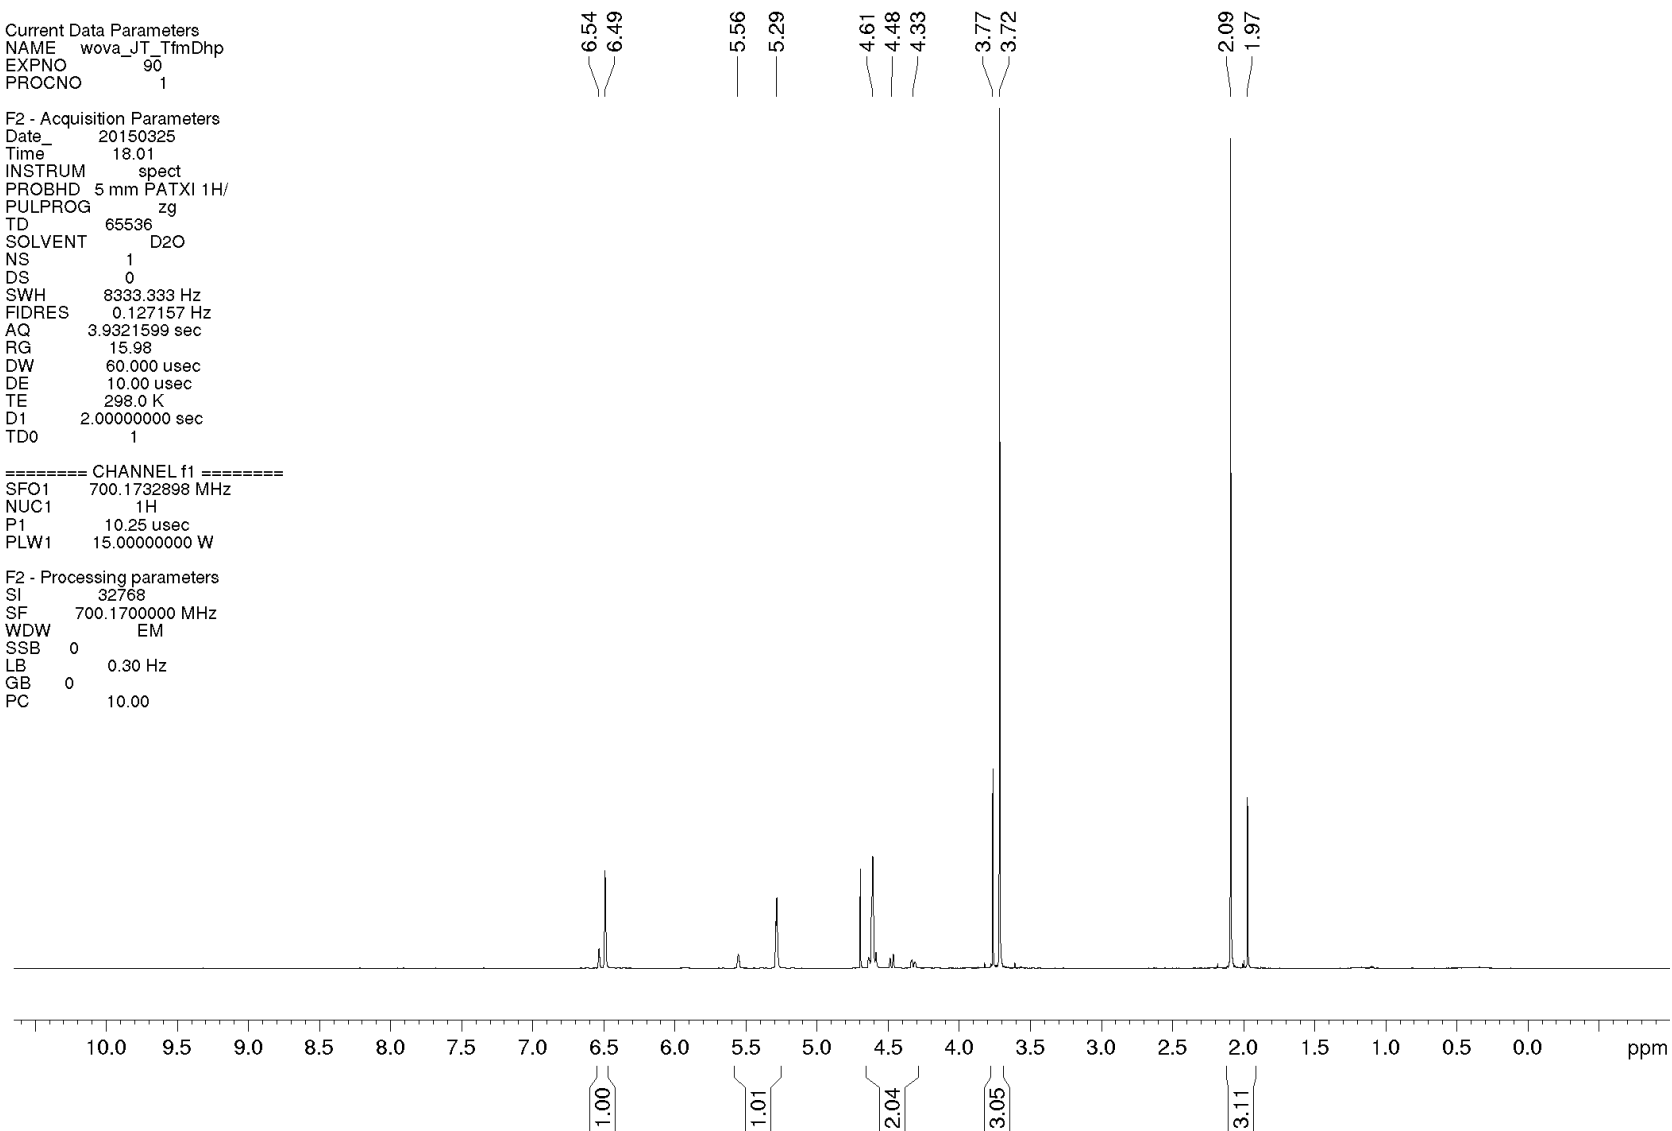

S28

$^{13}\text{C}\{^1\text{H}\}$  NMR spectrum of compound **8** (Ac-TfmDhp-OMe) in  $\text{D}_2\text{O}$

Current Data Parameters  
NAME wova\_JT\_TfmDhp  
EXPNO 95  
PROCNO 1

F2 - Acquisition Parameters  
Date\_ 20150325  
Time 18.50  
INSTRUM spect  
PROBHD 5 mm PATXI 1H/  
PULPROG zgig30  
TD 32768  
SOLVENT  $\text{D}_2\text{O}$   
NS 1024  
DS 8  
SWH 40760.871 Hz  
FIDRES 1.243923 Hz  
AQ 0.4019541 sec  
RG 2050  
DW 12.267 usec  
DE 10.00 usec  
TE 298.0 K  
D1 2.00000000 sec  
D11 0.03000000 sec  
TD0 128

===== CHANNEL f1 =====  
SFO1 176.0763711 MHz  
NUC1  $^{13}\text{C}$   
P1 11.00 usec  
PLW1 250.00000000 W

===== CHANNEL f2 =====  
SFO2 700.1728007 MHz  
NUC2  $^1\text{H}$   
CPDPRG[2] waltz16  
PCPD2 65.00 usec  
PLW2 15.00000000 W  
PLW12 0.35148999 W

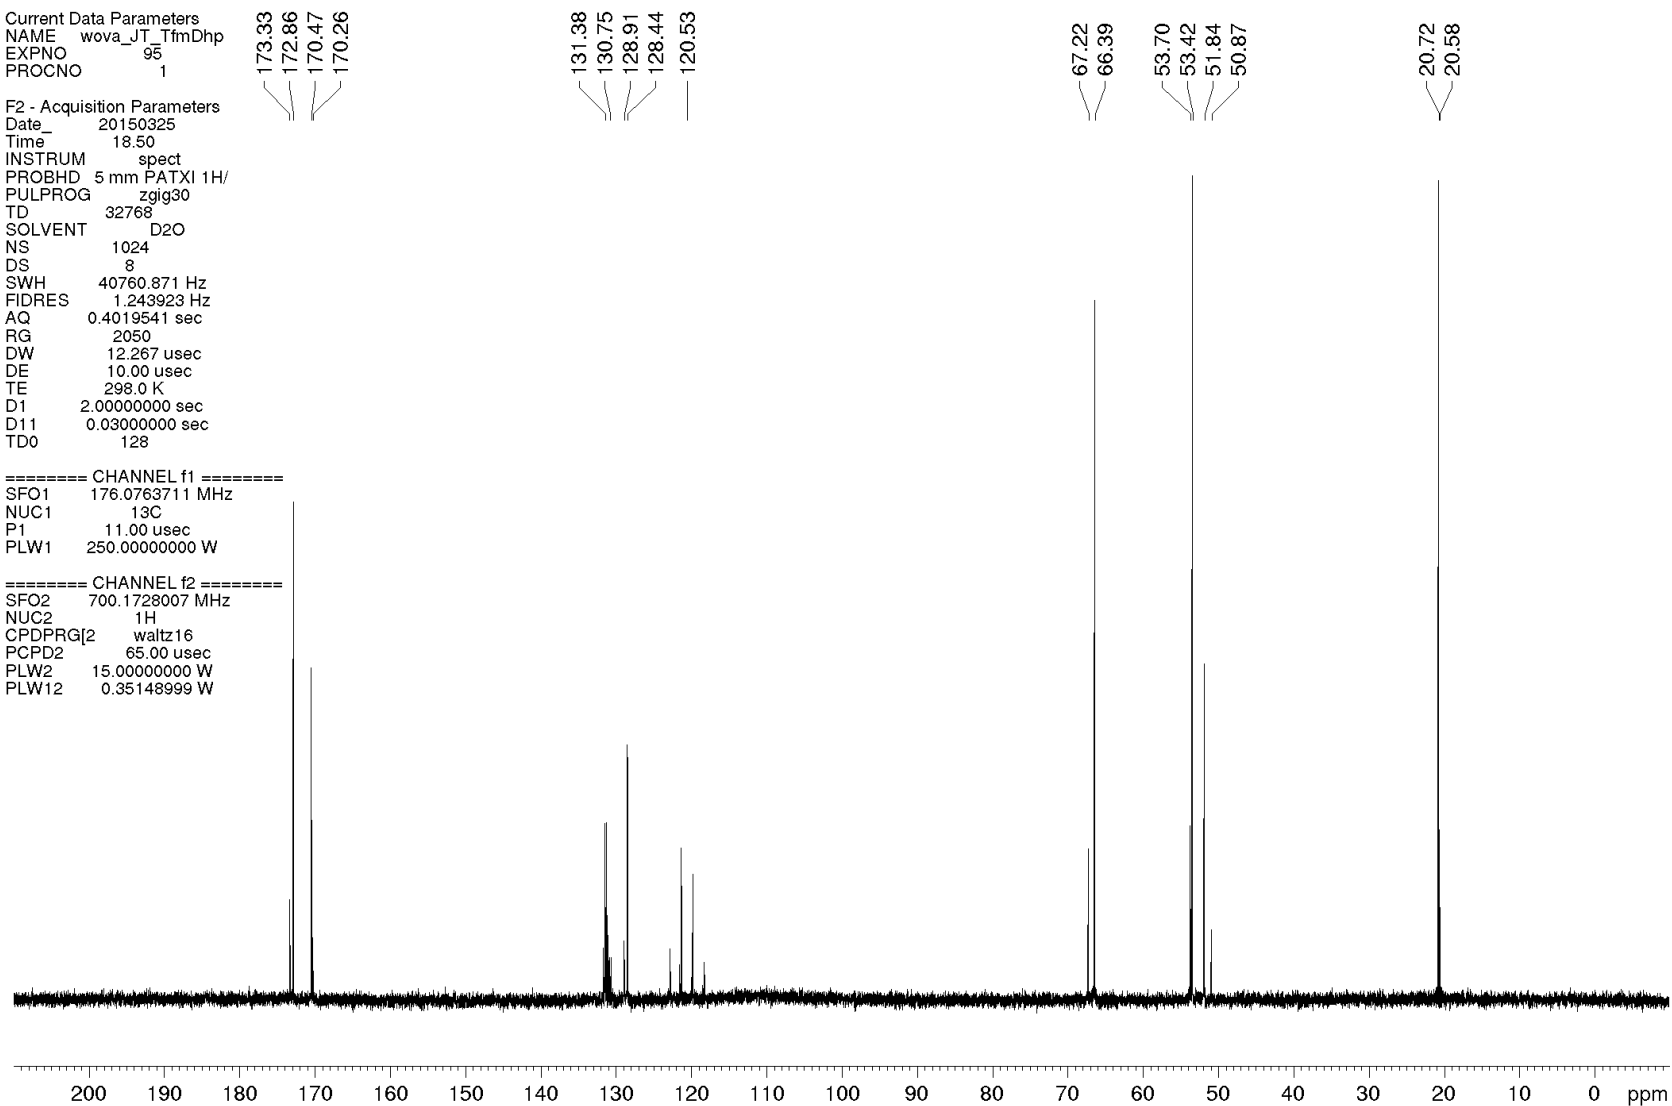

<sup>19</sup>F NMR spectrum of compound **8** (Ac-TfmDhp-OMe) in D<sub>2</sub>O

Current Data Parameters  
NAME wova\_JT\_TfmDhp  
EXPNO 81  
PROCNO 1

F2 - Acquisition Parameters  
Date\_ 20150324  
Time 14.25  
INSTRUM spect  
PROBHD 5 mm PATXI 1H/  
PULPROG zg30  
TD 65536  
SOLVENT D2O  
NS 1  
DS 0  
SWH 32894.738 Hz  
FIDRES 0.501934 Hz  
AQ 0.9961472 sec  
RG 1290  
DW 15.200 usec  
DE 50.00 usec  
TE 298.0 K  
D1 1.00000000 sec  
TD0 1

===== CHANNEL f1 =====  
SFO1 658.771917 MHz  
NUC1 19F  
P1 10.75 usec  
PLW1 15.00000000 W

F2 - Processing parameters  
SI 65536  
SF 658.8180370 MHz  
WDW EM  
SSB 0  
LB 1.00 Hz  
GB 0  
PC 10.00

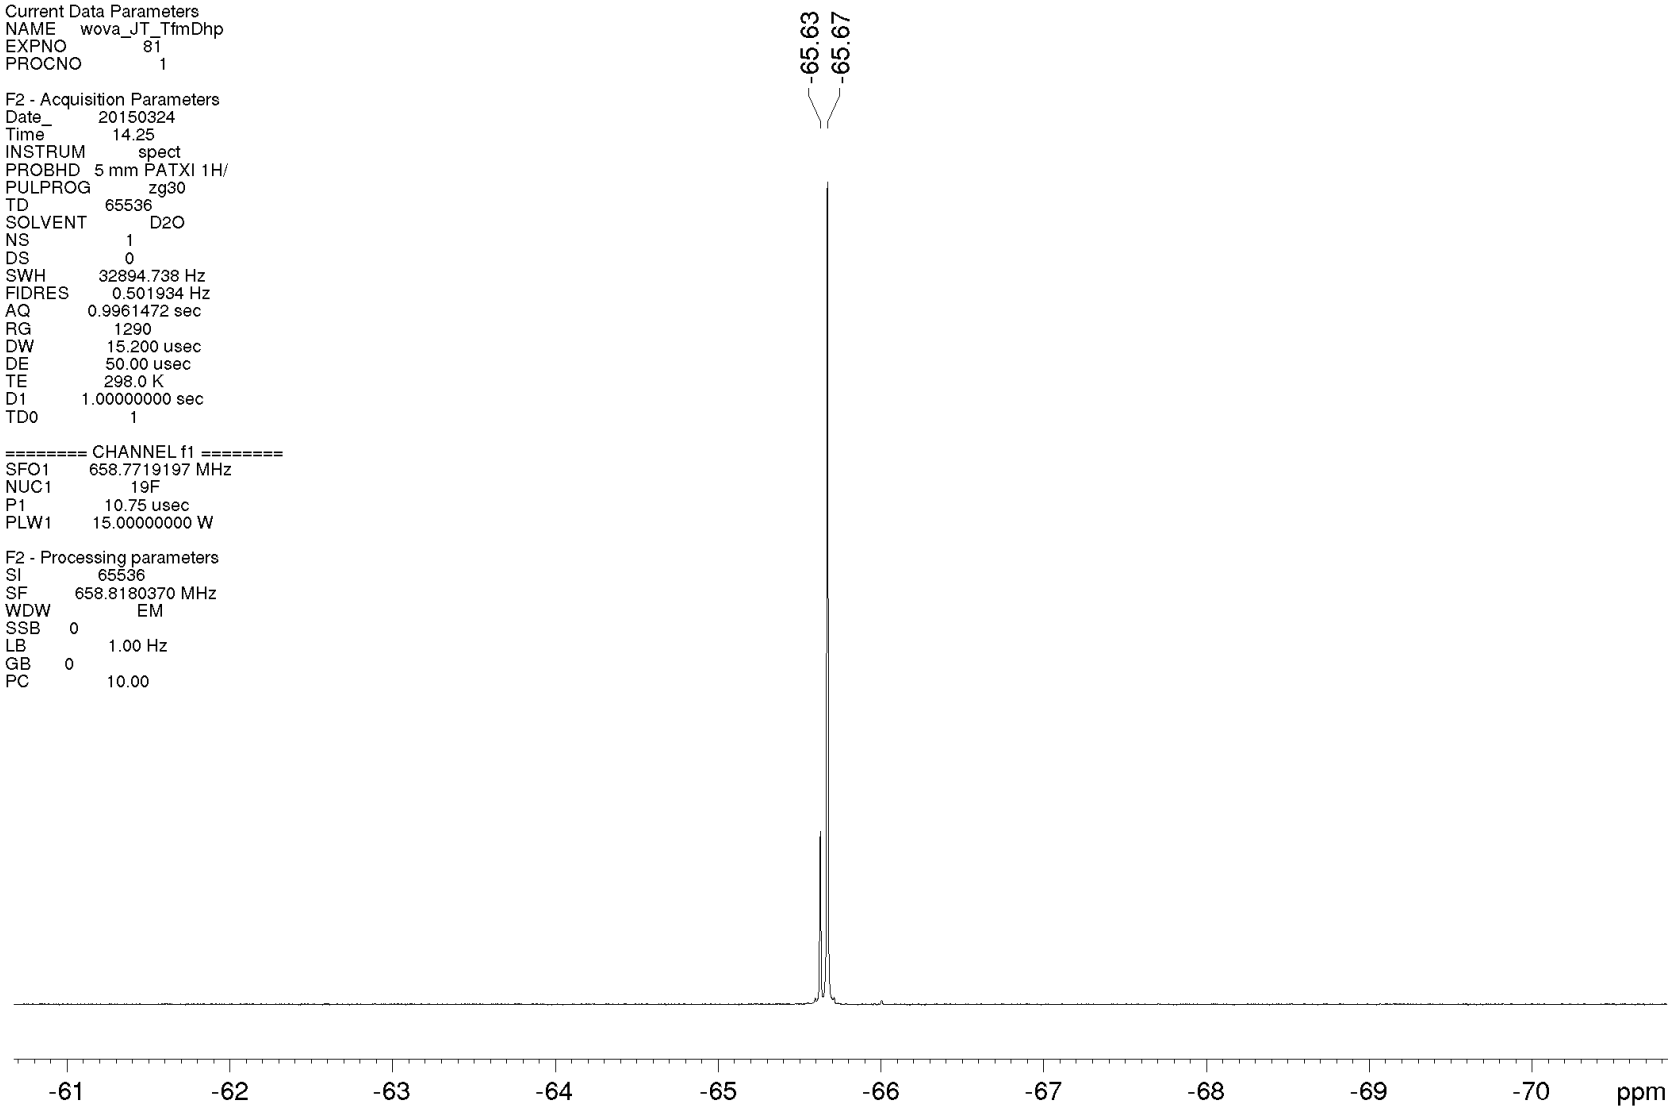

S30

X-ray crystal structure of compound **5**, ellipsoid plot

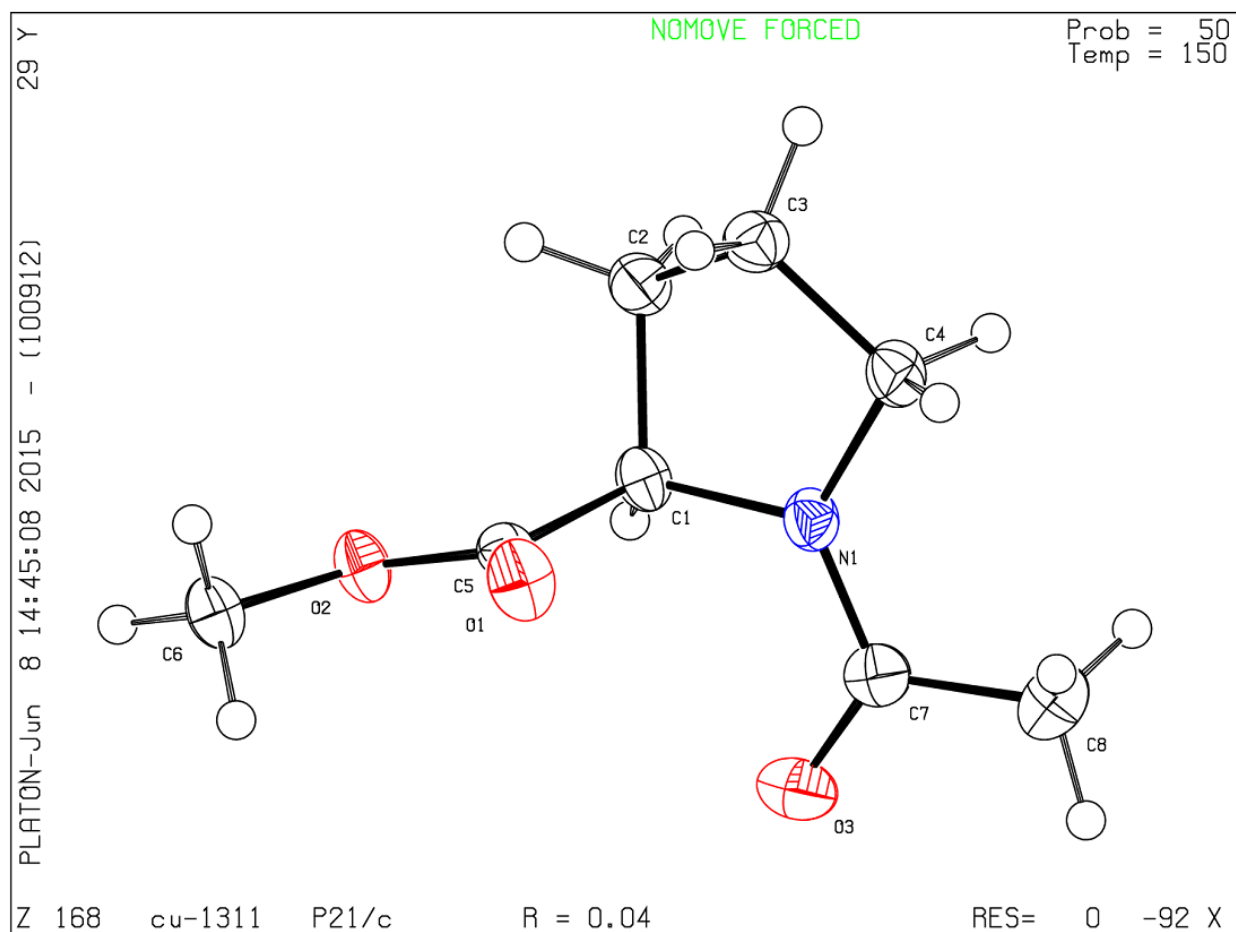

X-ray crystal structure of compound **6**, ellipsoid plot

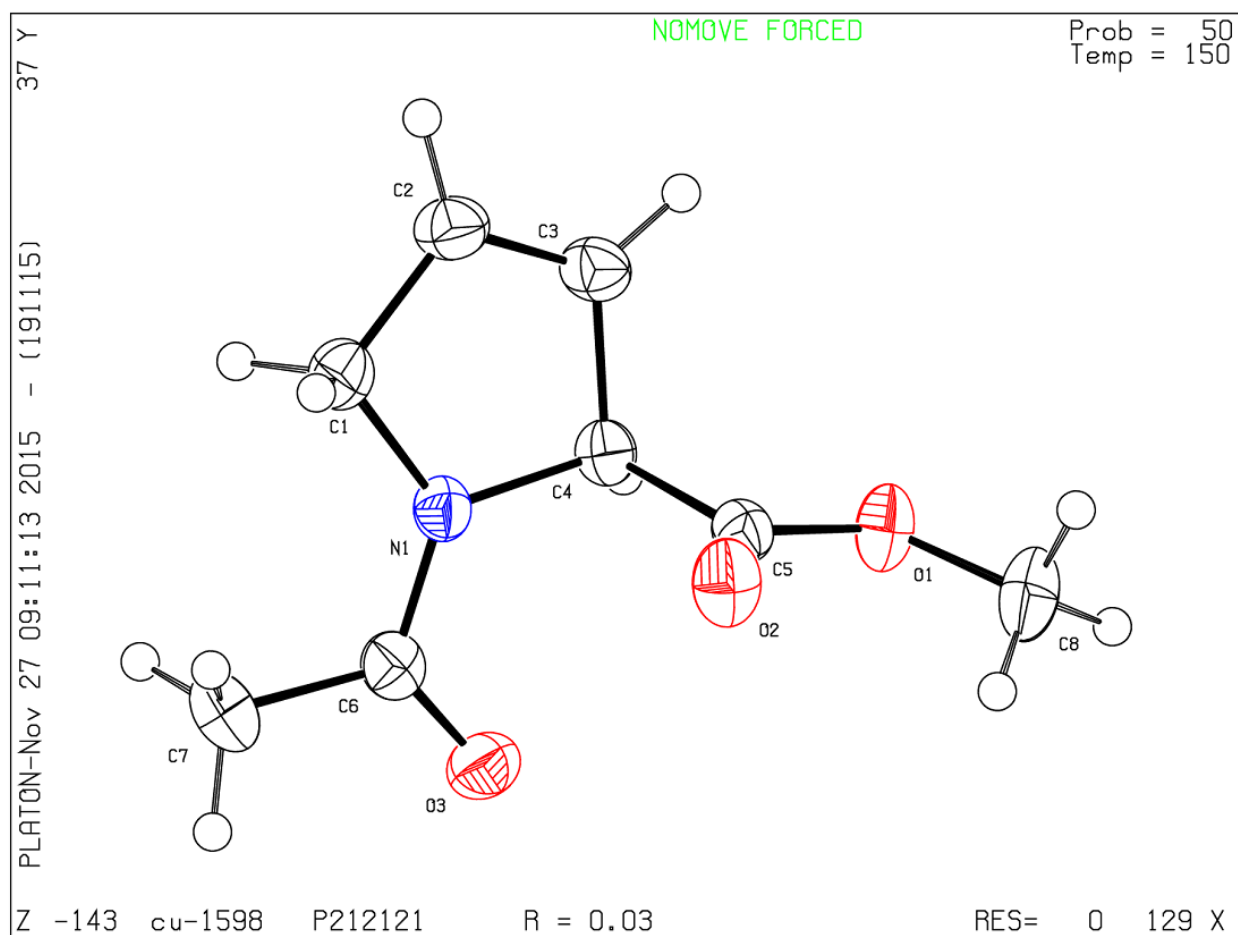



X-ray crystal structure of compound **8**, ellipsoid plot

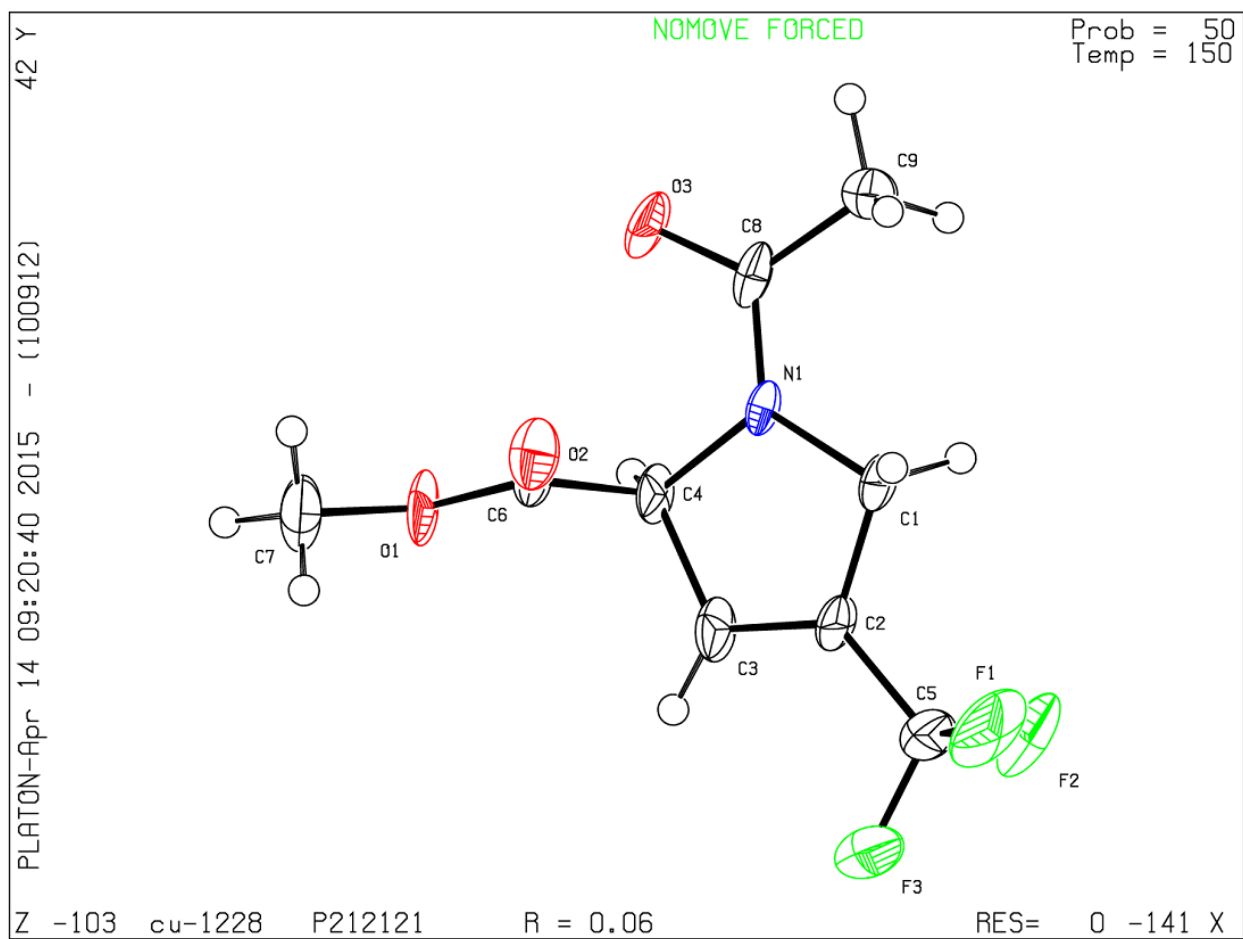

X-ray crystal structure of compound **9**, ellipsoid plot

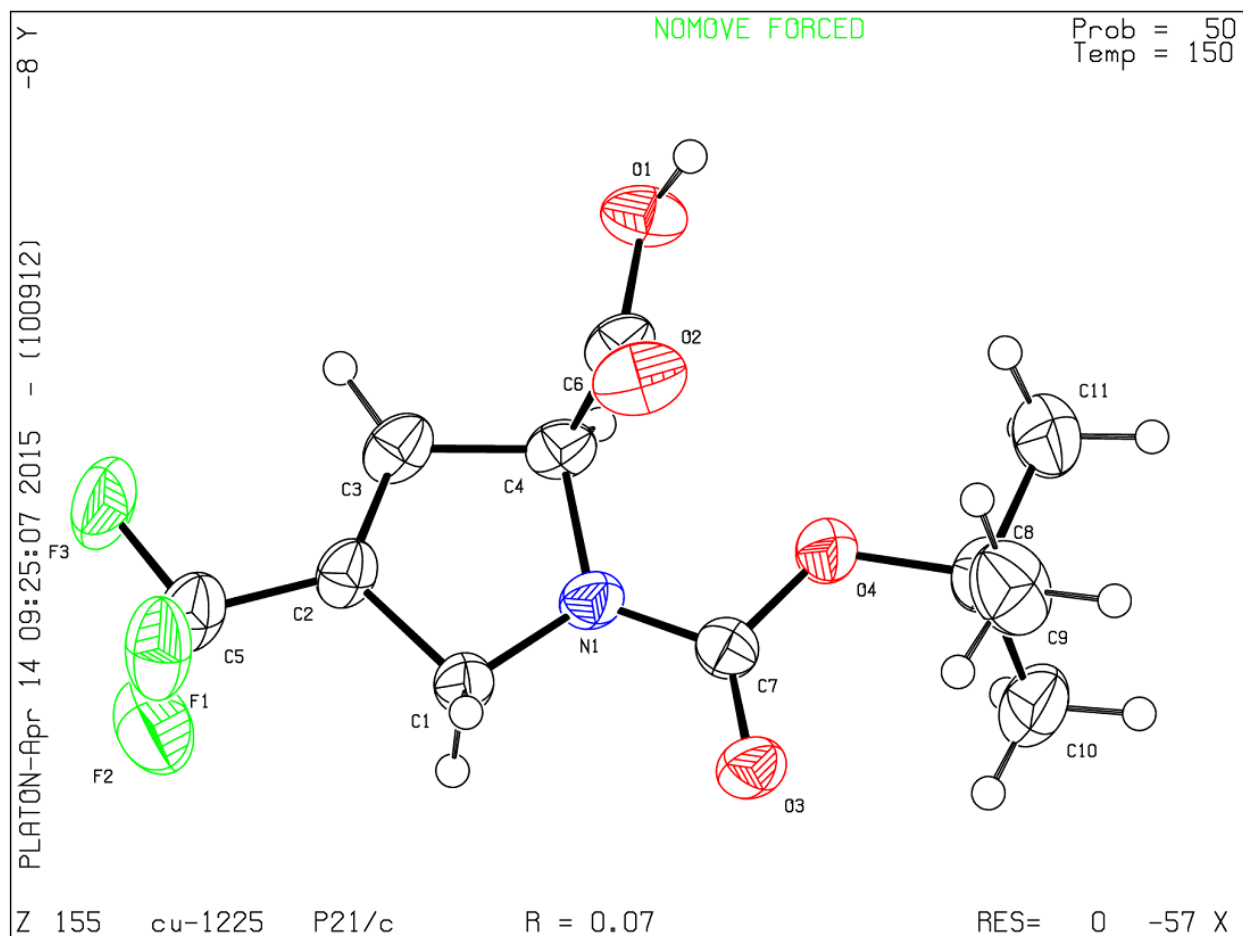

Supplement: Additional file 1 [file 1860-5397-12-57-S1.pdf]
